# Supplementary material for: Immune microenvironment characterisation and dynamics during anti-HER2-based neoadjuvant treatment in HER2-positive breast cancer
Source: PubMed Central journal article supplement (PMC7979716; doi:10.1038/s41698-021-00163-6), 2021-03-19
Supplement: 41698_2021_163_MOESM1_ESM.pdf [file 41698_2021_163_MOESM1_ESM.pdf]

**Supplementary Table 1. Immune cells densities**

|              | <b>Timepoint</b> | <b>n</b> | <b>mean</b> | <b>median</b> | <b>min</b> | <b>max</b> | <b>IQR</b> | <b>p value (SCR vs D15)</b> |
|--------------|------------------|----------|-------------|---------------|------------|------------|------------|-----------------------------|
| <b>CD3</b>   | ALL              | 114      | 1498        | 1169          | 33         | 7278       | 1650       | 0.14                        |
|              | SCR              | 65       | 1379        | 832           | 33         | 5579       | 1795       |                             |
|              | W2               | 49       | 1655        | 1462          | 140        | 7278       | 1453       |                             |
| <b>CD8</b>   | ALL              | 114      | 733         | 487           | 18         | 4653       | 763        | 0.04                        |
|              | SCR              | 65       | 638         | 364           | 18         | 2975       | 841        |                             |
|              | W2               | 49       | 859         | 668           | 24         | 4653       | 526        |                             |
| <b>CD4</b>   | ALL              | 114      | 629         | 500           | 12         | 2488       | 719        | 0.25                        |
|              | SCR              | 65       | 608         | 445           | 12         | 2402       | 684        |                             |
|              | W2               | 49       | 658         | 534           | 48         | 2488       | 684        |                             |
| <b>Foxp3</b> | ALL              | 114      | 161         | 108           | 0          | 1460       | 190        | 0.05                        |
|              | SCR              | 65       | 133         | 83            | 0          | 844        | 141        |                             |
|              | W2               | 49       | 198         | 166           | 6          | 1460       | 219        |                             |

**Supplementary Table 2. Proportion of proliferating T cells by location (ALL dataset)**

| <b>CD3+Ki67+</b>   |            |             |               |            |            |            |               |
|--------------------|------------|-------------|---------------|------------|------------|------------|---------------|
| <b>LOCATION</b>    | <b>n</b>   | <b>mean</b> | <b>median</b> | <b>min</b> | <b>max</b> | <b>IQR</b> | <b>pvalue</b> |
| <b>A</b>           | <b>111</b> | 11.9        | <b>9.72</b>   | 0          | 60.4       | 12.7       |               |
| <b>B</b>           | <b>110</b> | 7.74        | <b>6.30</b>   | 0          | 33.6       | 6.99       |               |
| <b>C</b>           | <b>110</b> | 4.50        | <b>3.48</b>   | 0          | 18.3       | 4.04       | <0.0001       |
| <b>CD4+Ki67+</b>   |            |             |               |            |            |            |               |
| <b>A</b>           | <b>111</b> | 12.7        | <b>11.0</b>   | 0          | 60.3       | 13.2       |               |
| <b>B</b>           | <b>110</b> | 8.63        | <b>7.43</b>   | 0          | 33.4       | 7.48       |               |
| <b>C</b>           | <b>110</b> | 6.18        | <b>5.39</b>   | 0          | 21.0       | 5.57       | <0.0001       |
| <b>CD8+Ki67+</b>   |            |             |               |            |            |            |               |
| <b>A</b>           | <b>111</b> | 11.9        | <b>8.74</b>   | 0          | 60.7       | 13.0       |               |
| <b>B</b>           | <b>110</b> | 7.85        | <b>5.68</b>   | 0          | 35.3       | 7.59       |               |
| <b>C</b>           | <b>110</b> | 5.57        | <b>4.29</b>   | 0          | 34.5       | 5.17       | <0.0001       |
| <b>Foxp3+Ki67+</b> |            |             |               |            |            |            |               |
| <b>A</b>           | <b>109</b> | 18.3        | <b>15.9</b>   | 0          | 85.7       | 18.2       |               |
| <b>B</b>           | <b>110</b> | 13.7        | <b>13.3</b>   | 0          | 50         | 13.7       |               |
| <b>C</b>           | <b>110</b> | 10.5        | <b>9.28</b>   | 0          | 100        | 9.85       | <0.0001       |

**Supplementary Table 3. Differences of immune cells by HR status across locations**

| <b>CD3</b>   |           |       |        |       |        |       |          |
|--------------|-----------|-------|--------|-------|--------|-------|----------|
|              | HR status | mean  | median | min   | max    | IQR   | Wilcoxon |
| A            | HR-       | 3324. | 1665.  | 19.4  | 20234. | 2686. |          |
|              | HR+       | 1833. | 1235.  | 48.6  | 17819. | 1779. | 0.2      |
|              |           |       |        |       |        |       |          |
|              | HR status | mean  | median | min   | max    | IQR   |          |
| B            | HR-       | 3285. | 2949.  | 68.8  | 13498. | 3199. |          |
|              | HR+       | 1829. | 1261.  | 38.2  | 11628. | 2143. | 0.005    |
|              |           |       |        |       |        |       |          |
|              | HR status | mean  | median | min   | max    | IQR   |          |
| C            | HR-       | 1933. | 1760.  | 0     | 6748.  | 2004. |          |
|              | HR+       | 1256. | 884.   | 40.7  | 4945.  | 1099. | 0.012    |
|              |           |       |        |       |        |       |          |
| <b>CD4</b>   |           |       |        |       |        |       |          |
|              | HR status | mean  | median | min   | max    | IQR   |          |
| A            | HR-       | 1108. | 722.   | 3.95  | 6095.  | 1309. |          |
|              | HR+       | 711.  | 413.   | 19.1  | 4182.  | 861.  | 0.3      |
|              |           |       |        |       |        |       |          |
|              | HR status | mean  | median | min   | max    | IQR   |          |
| B            | HR-       | 1205. | 890.   | 31.2  | 4017.  | 1632. |          |
|              | HR+       | 766.  | 530.   | 8.97  | 3503.  | 794.  | 0.012    |
|              |           |       |        |       |        |       |          |
|              | HR status | mean  | median | min   | max    | IQR   |          |
| C            | HR-       | 791.  | 711.   | 0     | 2524.  | 876.  |          |
|              | HR+       | 551.  | 424.   | 18.8  | 2037.  | 574.  | 0.038    |
|              |           |       |        |       |        |       |          |
| <b>CD8</b>   |           |       |        |       |        |       |          |
|              | HR status | mean  | median | min   | max    | IQR   |          |
| A            | HR-       | 1938. | 668.   | 11.9  | 15641. | 1863. |          |
|              | HR+       | 929.  | 585.   | 15.2  | 12010. | 777.  | 0.19     |
|              |           |       |        |       |        |       |          |
|              | HR status | mean  | median | min   | max    | IQR   |          |
| B            | HR-       | 1782. | 1150.  | 32.6  | 10111. | 1875. |          |
|              | HR+       | 847.  | 562.   | 22.7  | 6744.  | 865.  | 0.004    |
|              |           |       |        |       |        |       |          |
|              | HR status | mean  | median | min   | max    | IQR   |          |
| C            | HR-       | 911.  | 663.   | 0     | 4153.  | 1146. |          |
|              | HR+       | 540.  | 366.   | 16.3  | 2863.  | 455.  | 0.011    |
|              |           |       |        |       |        |       |          |
| <b>Foxp3</b> |           |       |        |       |        |       |          |
|              | HR status | mean  | median | min   | max    | IQR   |          |
| A            | HR-       | 348.  | 161.   | 0.359 | 2756.  | 373.  |          |
|              | HR+       | 191.  | 90.1   | 0     | 1743.  | 137.  | 0.085    |
|              |           |       |        |       |        |       |          |
|              | HR status | mean  | median | min   | max    | IQR   |          |
| B            | HR-       | 380.  | 292.   | 4.13  | 2521.  | 422.  |          |
|              | HR+       | 194.  | 97.7   | 0.406 | 1819.  | 206.  | 0.00036  |
|              |           |       |        |       |        |       |          |
|              | HR status | mean  | median | min   | max    | IQR   |          |
| C            | HR-       | 225.  | 216.   | 0     | 1412.  | 238.  |          |
|              | HR+       | 122.  | 70.0   | 0.646 | 999.   | 123.  | 0.0013   |

**Supplementary Table 4. Proportion of proliferating T cells by HR status**

|           | <b>SUBTYPE</b> | <b>n</b> | <b>mean</b> | <b>median</b> | <b>min</b> | <b>max</b> | <b>IQR</b> | <b>p value</b> |
|-----------|----------------|----------|-------------|---------------|------------|------------|------------|----------------|
| CD4       | HR-            | 61       | 9.80        | 8.74          | 0.530      | 41.4       | 8.38       | 0.0088         |
|           | HR+            | 53       | 6.21        | 5.35          | 0          | 21.7       | 5.74       |                |
| CD8       | HR-            | 61       | 9.55        | 6.93          | 0.410      | 50.5       | 9.52       | 0.011          |
|           | HR+            | 53       | 5.43        | 4.02          | 0          | 22.6       | 6.15       |                |
| Foxp3     | HR-            | 61       | 13.6        | 13.5          | 1.03       | 46.3       | 11.6       | 0.71           |
|           | HR+            | 53       | 13.2        | 12.1          | 0          | 75         | 12.8       |                |
| CD3       | HR-            | 61       | 9.39        | 7.77          | 0.472      | 43.6       | 8.20       | 0.0065         |
|           | HR+            | 53       | 5.58        | 4.57          | 0          | 22.4       | 5.15       |                |
| Foxp3/CD8 | HR-            | 61       | 1.90        | 1.33          | 0.644      | 6.43       | 1.46       | 0.0039         |
|           | HR+            | 51       | 3.67        | 2.29          | 0          | 19.6       | 2.37       |                |

**Supplementary Table 5. Immune cells proliferation by timepoint**

|                    | <b>TIMEPOINT</b> | <b>n</b> | <b>mean</b> | <b>median</b> | <b>min</b> | <b>max</b> | <b>IQR</b> |
|--------------------|------------------|----------|-------------|---------------|------------|------------|------------|
| <b>CD4+Ki67+</b>   | SCR              | 65       | 10.0        | 8.81          | 0          | 40.2       | 10.3       |
|                    | W2               | 49       | 5.62        | 3.67          | 0.651      | 41.4       | 4.23       |
| <b>CD8+Ki67+</b>   | SCR              | 65       | 9.30        | 7.60          | 0          | 50.5       | 8.53       |
|                    | W2               | 49       | 5.42        | 3.03          | 0.348      | 44.7       | 3.85       |
| <b>Foxp3+Ki67+</b> | SCR              | 65       | 16.4        | 15.0          | 0          | 75         | 9.54       |
|                    | W2               | 49       | 9.34        | 7.48          | 0.796      | 46.3       | 10.0       |
| <b>CD3+Ki67+</b>   | SCR              | 65       | 9.28        | 7.90          | 0          | 43.6       | 9.47       |
|                    | W2               | 49       | 5.43        | 3.16          | 0.685      | 42.5       | 4.57       |

**Supplementary Table 6. Changes in densities of immune cell subpopulations between Day 15 and baseline according to baseline PAM50 intrinsic subtype and hormone receptor (HR) status**

| Immune Cell Population          | Day 15: Median (IQR) | Baseline: Median (IQR) | N (pairs) | mean difference | 95% CI        | p-value          |
|---------------------------------|----------------------|------------------------|-----------|-----------------|---------------|------------------|
| <b>Overall (N=39)</b>           |                      |                        |           |                 |               |                  |
| CD3+                            | 1312 (721-2203)      | 781 (493-2061)         | 39        | 496             | -13 - + 1004  | 0.135            |
| CD8+                            | 669 (352-884)        | 350 (135-798)          | 39        | 372             | 67 - 678      | <b>0.026</b>     |
| CD4+                            | 532 (282-1014)       | 354 (202-664)          | 39        | 129             | -71 - 329     | 0.171            |
| Foxp3+                          | 166 (45-374)         | 80 (29-156)            | 39        | 101             | 37 - + 166    | <b>0.002</b>     |
| %Ki67+CD3+                      | 3 (2-7)              | 8 (4-11)               | 39        | -3.7            | -5.4 - -2.0   | <b>&lt;0.001</b> |
| %Ki67+CD8+                      | 3 (2-6)              | 7 (4-11)               | 39        | -3.7            | -5.7 - -1.8   | <b>&lt;0.001</b> |
| %Ki67+CD4+                      | 3 (2-7)              | 9 (4-14)               | 39        | -4.3            | -5.9 - -2.6   | <b>&lt;0.001</b> |
| %Ki67+Foxp3+                    | 8 (3-14)             | 15 (10-19)             | 39        | -6.0            | -8.8 - -3.2   | <b>&lt;0.001</b> |
| <b>HR-positive (N=17)</b>       |                      |                        |           |                 |               |                  |
| CD3+                            | 749 (433-925)        | 781 (569-1372)         | 17        | -102            | -560 - 355    | 0.517            |
| CD8+                            | 367 (156-566)        | 350 (115-786)          | 17        | 31              | -201 - + 263  | 0.795            |
| CD4+                            | 295 (213-527)        | 352 (213-720)          | 17        | -108            | -316 - 100    | 0.225            |
| Foxp3+                          | 48 (29-117)          | 43 (28-110)            | 17        | 26              | -22 - + 74    | 0.218            |
| %Ki67+CD3+                      | 3 (1-4)              | 5 (3-8)                | 17        | -3.3            | -5.6 - -1.0   | <b>0.003</b>     |
| %Ki67+CD8+                      | 3 (1-4)              | 4 (3-8)                | 17        | -3.3            | -6.2 - -0.4   | <b>0.035</b>     |
| %Ki67+CD4+                      | 3 (2-5)              | 7 (3-9)                | 17        | -3.3            | -5.6 - -0.9   | <b>0.009</b>     |
| %Ki67+Foxp3+                    | 7 (4-12)             | 15 (9-18)              | 17        | -6.4            | -11.3 - -1.4  | <b>0.022</b>     |
| <b>HR-negative (N=22)</b>       |                      |                        |           |                 |               |                  |
| CD3+                            | 1892 (1358-2397)     | 799 (466-2130)         | 22        | 958             | 148 - 1768    | <b>0.033</b>     |
| CD8+                            | 779 (668-1281)       | 333 (146-926)          | 22        | 636             | 133 - 1139    | <b>0.010</b>     |
| CD4+                            | 839 (489-1160)       | 382 (198-559)          | 22        | 312             | 3 - 621       | <b>0.023</b>     |
| Foxp3+                          | 250 (159-305)        | 108 (48-187)           | 22        | 159             | 54 - 265      | <b>0.003</b>     |
| %Ki67+CD3+                      | 6 (3-8)              | 10 (8-16)              | 22        | -4.0            | -6.6 - -1.5   | <b>0.004</b>     |
| %Ki67+CD8+                      | 5 (2-8)              | 9 (6-15)               | 22        | -4.1            | -6.9 - -1.3   | <b>0.002</b>     |
| %Ki67+CD4+                      | 6 (2-10)             | 10 (8-16)              | 22        | -5              | -7.4 - -2.6   | <b>&lt;0.001</b> |
| %Ki67+Foxp3+                    | 9 (2-14)             | 15 (10-20)             | 22        | -5.7            | -9.2 - -2.1   | <b>0.004</b>     |
| <b>Non HER2-Enriched (N=12)</b> |                      |                        |           |                 |               |                  |
| CD3+                            | 624 (431-903)        | 807 (580-1196)         | 12        | -134            | -716 - 448    | 0.339            |
| CD8+                            | 332 (191-445)        | 328 (106-683)          | 12        | -44             | -346 - + 258  | 0.791            |
| CD4+                            | 250 (150-348)        | 381 (331-508)          | 12        | -47             | -296 - 202    | 0.339            |
| Foxp3+                          | 42 (20-64)           | 40 (24-90)             | 12        | 12              | -27 - 51      | 0.583            |
| %Ki67+CD3+                      | 3 (2-3)              | 5 (3-7)                | 12        | -2.1            | -3.7 - -0.4   | <b>0.024</b>     |
| %Ki67+CD8+                      | 2 (1-4)              | 4 (3-7)                | 12        | -2.2            | -4.3 - +0.1   | 0.051            |
| %Ki67+CD4+                      | 3 (2-5)              | 6 (2-9)                | 12        | -1.9            | -4.3 - + 0.5  | 0.298            |
| %Ki67+Foxp3+                    | 11 (4-15)            | 15 (12-21)             | 12        | -5.5            | -12.0 - + 1.0 | 0.182            |
| <b>HER2-Enriched (N=27)</b>     |                      |                        |           |                 |               |                  |
| CD3+                            | 1780 (1210-2412)     | 768 (392-2226)         | 27        | 776             | 93 - + 1458   | <b>0.041</b>     |
| CD8+                            | 777 (578-1318)       | 360 (158-872)          | 27        | 557             | 144 - 670     | <b>0.004</b>     |
| CD4+                            | 713 (452-1142)       | 354 (190-911)          | 27        | 207             | -65 - 479     | 0.055            |
| Foxp3+                          | 223 (142-304)        | 88 (41-183)            | 27        | 141             | 52 - + 230    | <b>0.002</b>     |
| %Ki67+CD3+                      | 5 (2-8)              | 8 (5-15)               | 27        | -4.4            | -6.8 - 2.1    | <b>&lt;0.001</b> |
| %Ki67+CD8+                      | 4 (2-8)              | 8 (6-14)               | 27        | -4.4            | -7.2 - -1.7   | <b>0.001</b>     |
| %Ki67+CD4+                      | 5 (2-8)              | 9 (7-16)               | 27        | -5.3            | -7.4 - -3.2   | <b>&lt;0.001</b> |
| %Ki67+Foxp3+                    | 6 (3-12)             | 15 (9-19)              | 27        | -6.2            | -9.4 - 3.0    | <b>&lt;0.001</b> |

**Supplementary Table 7. Changes in TILs between Day 15 and baseline according HR status, PAM50 subtype and achievement of pCR**

|                                  | N<br>(pairs) | mean<br>difference | 95% CI<br>lower limit | 95% CI<br>upper limit | p-value          |
|----------------------------------|--------------|--------------------|-----------------------|-----------------------|------------------|
| HR-positive                      | 70           | 2.1%               | -0.7%                 | 4.8%                  | 0.199            |
| <i>HR-positive and pCR</i>       | 11           | 9.8%               | -2.9%                 | 22.5%                 | 0.141            |
| <i>HR-positive and RD</i>        | 59           | 0.6%               | -1.7%                 | 3.0%                  | 0.570            |
| HR-negative                      | 61           | 12.5%              | 5.5%                  | 19.6%                 | <b>&lt;0.001</b> |
| <i>HR-negative and pCR</i>       | 23           | 21.0%              | 6.0%                  | 36.1%                 | <b>0.014</b>     |
| <i>HR-negative and RD</i>        | 38           | 7.3%               | 0.5%                  | 14.2%                 | <b>0.029</b>     |
| HER2-enriched                    | 85           | 8.8%               | 3.5%                  | 14.0%                 | <b>0.001</b>     |
| <i>HER2-enriched and pCR</i>     | 30           | 15.8%              | 4.1%                  | 27.5%                 | <b>0.013</b>     |
| <i>HER2-enriched and RD</i>      | 55           | 4.9%               | 0.1%                  | 10.0%                 | <b>0.038</b>     |
| Non-HER2-enriched                | 46           | 3.5%               | -0.3%                 | 7.4%                  | 0.120            |
| <i>Non-HER2-enriched and pCR</i> | 4            | 29.5%              | -10.8%                | 69.8%                 | 0.181            |
| <i>Non-HER2-enriched and RD</i>  | 42           | 1.1%               | -1.4%                 | 3.5%                  | 0.488            |

**Supplementary Table 8. Distribution of tumors according to TILs at baseline, day 15 and surgery in patients not achieving pCR (N=105 patients)**

| <b>Category according to TIL levels</b> | <b>Baseline</b> | <b>Day 15</b> | <b>Surgery</b> |
|-----------------------------------------|-----------------|---------------|----------------|
|                                         | <b>N (%)</b>    | <b>N (%)</b>  | <b>N (%)</b>   |
| <i><b>TILs &lt;5%</b></i>               | 13 (12.5%)      | 6 (6.1%)      | 10 (10.3%)     |
| <i><b>TILs 5-9%</b></i>                 | 39 (37.5%)      | 28 (28.6%)    | 37 (38.1%)     |
| <i><b>TILs 10-19%</b></i>               | 24 (23.1%)      | 25 (25.5%)    | 22 (22.7%)     |
| <i><b>TILs 20-39%</b></i>               | 17 (16.3%)      | 25 (25.5%)    | 16 (16.5%)     |
| <i><b>TILs ≥40%</b></i>                 | 11 (10.6%)      | 14 (14.3%)    | 12 (12.4%)     |
| <i><b>Not evaluable</b></i>             | N=1             | N=7           | N=8            |

*Percentages calculated on the total number of evaluable samples*



**Supplementary Table 9. Distribution of tumors according to TILs at baseline, day 15 and surgery in patients achieving pCR (N=46 patients)**

| <b>Category according to TIL levels</b> | <b>Baseline</b> | <b>Day 15</b> | <b>Surgery</b> |
|-----------------------------------------|-----------------|---------------|----------------|
|                                         | <b>N (%)</b>    | <b>N (%)</b>  | <b>N (%)</b>   |
| <b><i>TILs &lt;5%</i></b>               | 6 (13.6%)       | 2 (5.5%)      | 13(32.5%)      |
| <b><i>TILs 5-9%</i></b>                 | 12 (27.3%)      | 5 (13.9%)     | 13 (32.5%)     |
| <b><i>TILs 10-19%</i></b>               | 5 (11.4%)       | 4 (11.1%)     | 6 (15.0%)      |
| <b><i>TILs 20-39%</i></b>               | 12 (27.3%)      | 7 (19.4%)     | 2 (5.0%)       |
| <b><i>TILs ≥40%</i></b>                 | 9 (20.5%)       | 18 (50.0%)    | 6 (15.0%)      |
| <b><i>Not evaluable</i></b>             | N=2             | N=10          | N=6            |

*Percentages calculated on the total number of evaluable samples*

**Supplementary Table 10. Changes in TILs between surgery and Day 15 according to HR status, PAM50 subtype and achievement of pathological complete response (pCR) versus residual disease (RD)**

|                                  | N (pairs) | mean difference | 95% CI        | p-value      |
|----------------------------------|-----------|-----------------|---------------|--------------|
| HR-positive                      |           |                 |               |              |
| <i>HR-positive and pCR</i>       | 11        | -11.8%          | -22.4 to -1.3 | <b>0.036</b> |
| <i>HR-positive and RD</i>        | 56        | +1.2%           | -2.8 to +5.1  | 0.736        |
| HR-negative                      |           |                 |               |              |
| <i>HR-negative and pCR</i>       | 22        | -26.3%          | -43.5 to -9.2 | <b>0.011</b> |
| <i>HR-negative and RD</i>        | 35        | -4.1%           | -9.9 to +1.7  | 0.196        |
| HER2-enriched                    |           |                 |               |              |
| <i>HER2-enriched and pCR</i>     | 29        | -19.5%          | -32.7 to -6.3 | <b>0.008</b> |
| <i>HER2-enriched and RD</i>      | 50        | +3.2%           | -8.2 to +1.8  | 0.165        |
| Non-HER2-enriched                |           |                 |               |              |
| <i>Non-HER2-enriched and pCR</i> | 4         | -36.0%          | -62.2 to -9.8 | <b>0.022</b> |
| <i>Non-HER2-enriched and RD</i>  | 41        | +2.0%           | -2.0 to +5.9  | 0.353        |

**Supplementary Table 11. Proportion of patients with different tumor-infiltrating lymphocytes (TILs) dynamics across the three different timepoints assessed in the PAMELA trial (N=122 patients with TILs data from all three timepoints)**

| From Baseline to Day 15 |    |      | From Day 15 to Surgery |    |      |
|-------------------------|----|------|------------------------|----|------|
|                         | N  | %    |                        | N  | %    |
| Increasing TILs         | 51 | 41.8 | Increasing TILs        | 4  | 7.8  |
|                         |    |      | Unchanged TILs         | 15 | 29.4 |
|                         |    |      | Decreasing TILs        | 32 | 62.7 |
| Unchanged TILs          | 46 | 37.7 | Increasing TILs        | 16 | 34.8 |
|                         |    |      | Unchanged TILs         | 16 | 34.8 |
|                         |    |      | Decreasing TILs        | 14 | 30.4 |
| Decreasing TILs         | 25 | 20.5 | Increasing TILs        | 6  | 24   |
|                         |    |      | Unchanged TILs         | 13 | 52   |
|                         |    |      | Decreasing TILs        | 6  | 24   |

**Supplementary Table 12. Changes in TILs between surgery and baseline in patients achieving pCR and not achieving pCR according to HR status and PAM50 subtype**

|                                       | N (pairs) | mean difference | 95% CI - lower limit | 95% CI - upper limit | p-value      |
|---------------------------------------|-----------|-----------------|----------------------|----------------------|--------------|
| <b>Patients achieving pCR</b>         | <b>39</b> | <b>-8.3%</b>    | <b>-16.0%</b>        | <b>-0.6%</b>         | <b>0.02</b>  |
| HR-status                             |           |                 |                      |                      |              |
| <i>HR-positive</i>                    | 14        | -1.6%           | 10.1%                | -13.2%               | 0.456        |
| <i>HR-negative</i>                    | 25        | -12.1%          | -22.5%               | 1.7%                 | <b>0.023</b> |
| PAM50 subtype                         |           |                 |                      |                      |              |
| <i>HER2-enriched</i>                  | 35        | -8.5%           | -17.1%               | 0.1%                 | <b>0.035</b> |
| <i>Non-HER2-enriched</i>              | 4         | -6.5%           | -22.3%               | 9.3%                 | 0.414        |
| <b>Patients with residual disease</b> | <b>96</b> | <b>2.3%</b>     | <b>-1.2%</b>         | <b>5.8%</b>          | 0.069        |
| HR-status                             |           |                 |                      |                      |              |
| <i>HR-positive</i>                    | 60        | 2.1%            | -1.6%                | 5.7%                 | 0.286        |
| <i>HR-negative</i>                    | 36        | 2.6%            | -4.7%                | 10.0%                | 0.107        |
| PAM50 subtype                         |           |                 |                      |                      |              |
| <i>HER2-enriched</i>                  | 54        | 1.3%            | -4.4%                | 7.0%                 | 0.404        |
| <i>Non-HER2-enriched</i>              | 42        | 3.6%            | 0.1%                 | 7.0%                 | 0.059        |

**Supplementary Table 13. Complete lists of genes evaluated using the nCounter platform (plus five housekeeping genes: ACTB, MRPL19, PSMC4, RPLP0, SF3A1)**

A1CF  
AARS  
ABAT  
ABCB1  
ABCC3  
ABCC8  
ACOT4  
ACTL8  
ACTR3B  
ADM  
ADRA2A  
ADRA2C  
AFF3  
AGR2  
AGR3  
AHCYL1  
AKT1  
AKT3  
ALDH1A1  
ANGPTL4  
ANLN  
ANXA1  
ANXA8L2  
APC  
APH1B  
AR  
ARAF  
AREG  
ASF1A  
ATAD2  
ATAD3A  
ATM  
ATR  
AURKA  
AVEN  
AVL9  
AXL  
AZGP1  
BAG1  
BCL11A  
BCL2  
BCL2A1  
BDNF  
BIRC5  
BLM  
BLVRA  
BMI1  
BOP1  
BRAF

BRCA1  
BRCA2  
BTG2  
BTG3  
BUB1  
BYSL  
C11orf30  
C12orf11  
C16orf45  
C16orf61  
C1orf106  
C1orf21  
C21orf45  
C4orf32  
C4orf34  
C8orf30A  
C8orf33  
CA12  
CABP7  
CAMK2N1  
CAND1  
CAPN13  
CAPN6  
CAV1  
CBX7  
CCDC86  
CCNA2  
CCNB1  
CCND1  
CCND2  
CCND3  
CCNE1  
CD19  
CD24  
CD274  
CD3G  
CD4  
CD44  
CD68  
CD84  
CD86  
CD8A  
CDA  
CDC123  
CDC20  
CDC25B  
CDC25C  
CDC45L  
CDC6  
CDCA1  
CDCA5

CDCA7  
CDCA7L  
CDCA8  
CDH1  
CDH3  
CDK1  
CDK4  
CDKN1A  
CDKN1B  
CDKN2A  
CDKN2B  
CDKN2C  
CDKN2D  
CDKN3  
CDT1  
CDYL  
CEACAM6  
CELSR1  
CENPA  
CENPF  
CENPI  
CENPN  
CEP55  
CFLAR  
CHEK1  
CHEK2  
CHPF  
CHST11  
CHUK  
CITED4  
CKS1B  
CKS2  
CLDN3  
CLDN4  
CLDN7  
CLMN  
COG8  
COX4NB  
COX6C  
COX7B  
CRIM1  
CRYAB  
CSDA  
CTGF  
CTNNB1  
CTPS  
CTSL1  
CTSL2  
CXCL1  
CXCL14  
CXCR1

CXCR2  
CXXC5  
CYB5B  
CYBRD1  
CYCS  
CYR61  
DDB2  
DDIT4  
DDR1  
DEGS2  
DLGAP5  
DNAJC12  
DNALI1  
DSP  
E2F1  
ECE2  
EGFR  
EIF2S2  
ELOVL5  
ELSPBP1  
EMP3  
EPCAM  
EPN3  
EPSTI1  
ERBB2  
ERBB3  
ERBB4  
ERCC1  
ESR1  
ESRP1  
EVI2A  
EXO1  
EZH2  
F11R  
F3  
FABP4  
FABP5  
FAM171A1  
FAM174B  
FAM198B  
FAM38A  
FAM54A  
FANCA  
FANK1  
FAP  
FBN1  
FBP1  
FBXL6  
FGFR1  
FGFR2  
FGFR4



FIGF  
FLVCR2  
FNBP1  
FOXA1  
FOXC1  
FOXM1  
FREQ  
FZD6  
FZD7  
GABPB1  
GAL  
GALNT7  
GARS  
GATA3  
GGH  
GINS2  
GLRB  
GNG11  
GOLT1A  
GPR160  
GPR172A  
GPR89A  
GPSM2  
GRB7  
GREM1  
GRHL1  
GRHL2  
GSTM1  
GSTM3  
GSTM4  
GSTP1  
GTPBP4  
GUSB  
H19  
HEXIM1  
HIF1A  
HJURP  
HMGA1  
HN1  
HRAS  
HSPA14  
HSPD1  
hypothetical.LOC389332  
hypothetical.LOC400043  
hypothetical.protein.LOC642077  
hypothetical.protein.LOC647456  
hypothetical.protein.MGC18216  
ID4  
IDH2  
IDO1  
IFT74

IGBP1  
IGF1  
IGF2R  
IGFBP2  
IKBKB  
IKBKE  
IL1B  
IL6  
IL6R  
IL6ST  
IL8  
INHBA  
INPP4B  
INSIG1  
IRX3  
ITCH  
ITGA6  
ITGB1  
JUP  
KCNJ15  
KCTD1  
KDM4B  
KDR  
KIAA0040  
KIAA1324  
KIAA1370  
KIF13B  
KIF20A  
KIF23  
KIF2C  
KIF4A  
KIFC1  
KIT  
KLF4  
KLHL7  
KLHL9  
KNTC2  
KPNA1  
KRAS  
KRT14  
KRT16  
KRT17  
KRT18  
KRT19  
KRT23  
KRT5  
KRT6A  
KRT6B  
KRT6C  
KRT8  
KRTAP1.1

LAG3  
LAMA3  
LAMC2  
LEPRE1  
LHFP  
LRIG1  
LRP8  
LRRC2  
LSR  
LTBP2  
MAD2L1  
MAGEA1  
MAGOHB  
MAP2K1  
MAP2K4  
MAP7D3  
MAPT  
MCM2  
MCM3  
MDM2  
ME1  
MED21  
MELK  
MET  
MIA  
MIEN1  
MKi67  
MKRN2  
MLKL  
MLPH  
MME  
MMP11  
MPP1  
MRPS17  
MRPS35  
MS4A1  
MSH2  
MTHFD1L  
MTOR  
MUC1  
MUC5B  
MYB  
MYBL2  
MYC  
MYO5C  
NACC2  
NAT1  
NCAPH2  
NDRG1  
NDUFAF4  
NEK2

NEO1  
NF1  
NFIA  
NFIB  
NFKB1  
NFKBIA  
NFKBIB  
NFKBIE  
NLN  
NOP56  
NOTCH1  
NOTCH2  
NOTCH3  
NPEPPS  
NPM2  
NQO1  
NR4A3  
NRAS  
NT5E  
NTN4  
NUDCD1  
NUDT1  
NUP88  
NUP93  
OCLN  
OGFRL1  
OGN  
ORC6L  
P4HTM  
PARP1  
PCDH8  
PCNA  
PDCD1  
PDGFRA  
PDSS1  
PDXK  
PEX11G  
PGAM5  
PGR  
PHGDH  
PID1  
PIK3CA  
PIK3R1  
PIP  
PIR  
PITX1  
PLA1A  
PLOD1  
PNO1  
PNP  
POLD1

PPFIBP1  
PRAME  
PRC1  
PREP  
PROM1  
PSMA7  
PSMD14  
PSPH  
PSPHL  
PTDSS1  
PTEN  
PTGER4  
PTGS2  
PTTG1  
PUF60  
PUM1  
PVRL3  
PYROXD1  
RAB25  
RAB35  
RACGAP1  
RAD17  
RAD50  
RAD51  
RAD51C  
RAD51L1  
RAF1  
RAI2  
RANBP1  
RARA  
RB1  
RBBP8  
RECK  
RECQL  
REEP6  
RELA  
RELB  
RERG  
RFC4  
RGS22  
RHBG  
RINT1  
RNF103  
RRAGD  
RRM2  
RRP15  
S100A11  
S100A14  
S100A8  
S100A9  
SAPS1

SCGB2A2  
SCUBE2  
SEH1L  
SEMA3C  
SERPINA3  
SETBP1  
SFRP1  
SH2B3  
SHC1

similar.to.Keratin.type.II.cytoskeletal.8..Cytokeratin.8...CK.8...Keraton.8...K8.

SLC16A3  
SLC25A19  
SLC39A6  
SLC40A1  
SLC5A6  
SLC7A6  
SLC9A3  
SLC9A3R1  
SMO  
SNAI1  
SNRPA1  
SNRPD1  
SPAG5  
SPATA7  
SPDEF  
SPINT1  
SPINT2  
SQLE  
SRC  
ST18  
STAT1  
STAT3  
STC2  
STK11  
STK38L  
STMN1  
STRAP  
SUV39H2  
TACC3  
TAP1  
TCEAL1  
TCF7L1  
TFAM  
TFF1  
TFF3  
TFRC  
TGFBR2  
TGFBR3  
THBS1  
THY1  
TIMM17A

TIMM8A  
TK1  
TM7SF3  
TMCC2  
TMEM125  
TMEM139  
TMEM158  
TMEM208  
TMEM25  
TMEM45B  
TNFRSF11A  
TNFSF11  
TOM1L1  
TOMM40  
TOP2A  
TOR1A  
TP53  
TP53BP2  
TP63  
TRIM29  
TRIP13  
TSHZ1  
TSPAN13  
TTK  
TUBA4A  
TUBB6  
TWIST1  
TWIST2  
TYMP  
TYMS  
UBE2C  
UBE2T  
UCHL1  
UIMC1  
USP10  
VAMP8  
VAV3  
VEGFA  
VIM  
WDR12  
WDR4  
WIPF2  
XBP1  
YBX1  
ZEB1  
ZEB2  
ZNF217

**Supplementary Table 14. Genes up-regulated in association with TIL levels at quantitative SAM analysis (all timepoint combined, samples N=413) with False Discovery Rate <1%**

| Gene ID | Score(d) | q-value(%) |
|---------|----------|------------|
| MS4A1   | 8.903867 | 0          |
| CD19    | 8.57364  | 0          |
| LAG3    | 8.441398 | 0          |
| CD3G    | 8.390272 | 0          |
| CD8A    | 8.129773 | 0          |
| PDCD1   | 7.589843 | 0          |
| TAP1    | 6.742996 | 0          |
| CD274   | 6.401272 | 0          |
| IDO1    | 5.978856 | 0          |
| STAT1   | 5.965263 | 0          |
| IL6R    | 5.559205 | 0          |
| CD4     | 5.446276 | 0          |
| CD86    | 5.243833 | 0          |
| MLKL    | 5.084844 | 0          |
| EPSTI1  | 4.915366 | 0          |
| IKBKE   | 4.900681 | 0          |
| CHST11  | 4.742928 | 0          |
| CD84    | 4.517602 | 0          |
| NFKBIE  | 4.434747 | 0          |
| BCL2A1  | 4.370058 | 0          |
| TYMP    | 4.32247  | 0          |
| EVI2A   | 4.302834 | 0          |
| RELB    | 3.945947 | 0          |
| TUBA4A  | 3.797016 | 0          |
| CD68    | 3.674341 | 0          |
| FLVCR2  | 3.513351 | 0          |
| CDC25B  | 3.394281 | 0          |
| CFLAR   | 3.336673 | 0          |
| MPP1    | 3.166783 | 0          |
| EMP3    | 3.165354 | 0          |
| PTGER4  | 3.153685 | 0          |
| SAPS1   | 2.744665 | 0          |
| BLM     | 2.677925 | 0          |
| CD44    | 2.631944 | 0          |
| BTG2    | 2.51612  | 0.205387   |
| ABC1    | 2.319839 | 0.861731   |



**Supplementary Table 15. Genes up-regulated in association with TIL levels at quantitative SAM analysis at baseline (samples N=148) with False Discovery Rate <1%**

| Gene ID | Score(d) | q-value(%) |
|---------|----------|------------|
| CD8A    | 6.22832  | 0          |
| CD3G    | 5.957181 | 0          |
| LAG3    | 5.692738 | 0          |
| MS4A1   | 5.661252 | 0          |
| CD19    | 5.569917 | 0          |
| PDCD1   | 5.569657 | 0          |
| IDO1    | 5.547896 | 0          |
| CD274   | 5.272603 | 0          |
| STAT1   | 5.11594  | 0          |
| TAP1    | 5.085964 | 0          |
| EPSTI1  | 4.766666 | 0          |
| IL6R    | 4.496497 | 0          |
| NFKBIE  | 4.293866 | 0          |
| MLKL    | 4.10485  | 0          |
| BCL2A1  | 4.093467 | 0          |
| CD4     | 4.058705 | 0          |
| CFLAR   | 3.942835 | 0          |
| RELB    | 3.631598 | 0          |
| CHST11  | 3.566292 | 0          |
| EVI2A   | 3.551481 | 0          |
| CD86    | 3.326293 | 0          |
| IKBKE   | 3.058797 | 0          |
| CD84    | 2.997707 | 0          |
| EMP3    | 2.97741  | 0          |
| CCND2   | 2.928956 | 0          |
| PLA1A   | 2.916057 | 0          |
| TUBA4A  | 2.785798 | 0          |
| TYMP    | 2.758991 | 0          |
| PTGER4  | 2.746747 | 0          |
| ABCB1   | 2.698752 | 0          |
| BTG2    | 2.426338 | 0.675158   |
| CDC25B  | 2.419813 | 0.675158   |

**Supplementary Table 16. Genes up-regulated in association with TIL levels at quantitative SAM analysis at Day 15 (samples N=133) with False Discovery Rate <1%**

| Gene ID | Score(d)  | q-value(%) |
|---------|-----------|------------|
| MS4A1   | 4.9853006 | 0          |
| PDCD1   | 4.667656  | 0          |
| CD19    | 4.6125682 | 0          |
| CD8A    | 4.4783514 | 0          |
| LAG3    | 4.4566158 | 0          |
| CD3G    | 4.4164114 | 0          |
| CD274   | 3.2353967 | 0          |
| IL6R    | 3.1299524 | 0          |
| TAP1    | 2.9735575 | 0          |
| STAT1   | 2.8611134 | 0          |
| CD4     | 2.8579478 | 0          |
| EPSTI1  | 2.769441  | 0          |
| BCL2A1  | 2.7582879 | 0          |
| CD86    | 2.6210126 | 0          |
| CHST11  | 2.6114742 | 0          |
| IDO1    | 2.5656666 | 0          |
| IKBKE   | 2.3961171 | 0          |
| MLKL    | 2.3618481 | 0          |
| EVI2A   | 2.3408257 | 0          |
| TUBA4A  | 2.2860373 | 0          |
| CD84    | 2.263514  | 0          |
| FLVCR2  | 2.2223425 | 0          |
| CD68    | 2.1331608 | 0.241761   |
| BTG2    | 2.0955087 | 0.241761   |
| NFKBIE  | 2.0763461 | 0.241761   |
| BLM     | 2.0478201 | 0.449391   |
| CDC25B  | 1.9141768 | 0.834933   |
| TYMP    | 1.8918392 | 0.834933   |
| MPP1    | 1.8752434 | 0.834933   |

**Supplementary Table 17. Genes up-regulated in association with TIL levels at quantitative SAM analysis at Surgery (samples N=132) with False Discovery Rate <1%**

| Gene ID | Score(d) | q-value(%) |
|---------|----------|------------|
| MS4A1   | 3.959441 | 0          |
| CD19    | 3.555171 | 0          |
| CD8A    | 2.69107  | 0          |
| CD3G    | 2.428863 | 0          |
| LAG3    | 2.422838 | 0          |
| TAP1    | 2.400816 | 0          |
| TYMP    | 2.334461 | 0          |
| HMGA1   | 2.270879 | 0          |
| BLM     | 2.169032 | 0          |
| PRAME   | 2.01589  | 0          |
| IDO1    | 2.012051 | 0          |
| MKi67   | 1.948502 | 0          |
| CEP55   | 1.890432 | 0          |
| FOXM1   | 1.825431 | 0          |
| PDCD1   | 1.783179 | 0          |
| CDC6    | 1.773788 | 0          |
| CCNA2   | 1.741049 | 0          |
| KRT8    | 1.738559 | 0          |
| IKBKE   | 1.726431 | 0          |
| KIFC1   | 1.718271 | 0          |
| HJURP   | 1.715825 | 0          |
| TOP2A   | 1.713789 | 0          |

**Supplementary Table 18. NGI antibodies and protocols**

| ANTIBODY      | VENDOR | REFERENCE | ANTIGEN RETRIEVAL                                  | PRIMARY ANTIBODY    | PRIMARY ANTIBODY DILUTION | SECONDARY ANTIBODY | CHROMOGEN      |
|---------------|--------|-----------|----------------------------------------------------|---------------------|---------------------------|--------------------|----------------|
| FOXP3         | ABCAM  | AB99963   | CC1 92' 95 <sup>o</sup>                            | 1h RT               | 1/100                     | HRP RB 20'         | AECPLUS. 150UL |
| CD4 (SP35)    | ROCHE  | 790-4423  | CC2 8' 100 <sup>o</sup><br>CC1 95 <sup>o</sup> 56' | 52' 36 <sup>o</sup> | RTU                       | HRP RB 16'         | AECPLUS. 200UL |
| KI67 (MIB-1)  | DAKO   | M7240     | CC2 8' 100 <sup>o</sup><br>CC1 72' 95 <sup>o</sup> | 1h 32' RT           | 1/100                     | HRP MS 20'         | AECPLUS. 150UL |
| CD8 (SP57)    | ROCHE  | 790-4460  | CC2 8' 100 <sup>o</sup>                            | 28' 36 <sup>o</sup> | RTU                       | HRP RB 8'          | AECPLUS. 200UL |
| CD3 (2GV6)    | ROCHE  | 790-4341  | CC2 8' 100 <sup>o</sup><br>CC1 40' 95 <sup>o</sup> | 40' 36 <sup>o</sup> | RTU                       | HRP RB 8'          | AECPLUS. 200UL |
| AE1/AE3/PCK26 | ROCHE  | 760-2595  | CC2 8' 100 <sup>o</sup><br>CC1 40' 95 <sup>o</sup> | 24' 36 <sup>o</sup> | RTU                       | HRP MS 8'          | AECPLUS. 200UL |

**Supplementary Table 19. T-cell APP details**

|                                                                                                                                                                                                                                                                                                                                                                                                                          |                                                                                                                                                                                                                                                                                                                                                                                                                                                                                                                                                                                                                                                                         |
|--------------------------------------------------------------------------------------------------------------------------------------------------------------------------------------------------------------------------------------------------------------------------------------------------------------------------------------------------------------------------------------------------------------------------|-------------------------------------------------------------------------------------------------------------------------------------------------------------------------------------------------------------------------------------------------------------------------------------------------------------------------------------------------------------------------------------------------------------------------------------------------------------------------------------------------------------------------------------------------------------------------------------------------------------------------------------------------------------------------|
| Magnification                                                                                                                                                                                                                                                                                                                                                                                                            | 20X                                                                                                                                                                                                                                                                                                                                                                                                                                                                                                                                                                                                                                                                     |
| Classification method                                                                                                                                                                                                                                                                                                                                                                                                    | Cell classification                                                                                                                                                                                                                                                                                                                                                                                                                                                                                                                                                                                                                                                     |
| Classification feature                                                                                                                                                                                                                                                                                                                                                                                                   | CD3 channel- HDAB-DAB<br>Sensitivity: 98%<br>Size: 15um                                                                                                                                                                                                                                                                                                                                                                                                                                                                                                                                                                                                                 |
| Post processing<br>Change by area<br>Separate objects<br>Change by area<br>Change by area<br>Separate objects<br>Change<br>Change by intensity (Foxp3 channel)<br>Change by intensity (CD8 channel)<br>Change by intensity (CD4 channel)<br>Change by intensity (Ki67 channel)<br>Change by intensity (Ki67 channel)<br>Change by intensity (Ki67 channel)<br>Change by intensity (Ki67 channel)<br>Apply counting frame | Lbl: CD3+, Max: 10un2<br>Lbl: CD3+. Object diameter 7um<br>Lbl: CD3+, Max: 15un2, Clear<br>Lbl: CD3+, Max: 30un2, label 2<br>Lbl: label 2. Object diameter 5um2<br>Lbl: label 2 to CD3+<br>Lbl: CD3; intensity: -inf -> 150, %object 0%-30%, Foxp3+<br>Lbl: CD3; intensity: -inf -> 200, %object 0%-20%, CD8+<br>Lbl: CD3; intensity: -inf -> 200, %object 0%-20%, CD4+<br>Lbl: CD3; intensity: -inf -> 175, %object 0%-30%, CD3+Ki67+<br>Lbl: Foxp3; intensity: -inf -> 200, %object 0%-20%, Foxp3+Ki67+<br>Lbl: CD8; intensity: -inf -> 175, %object 0%-30%, CD8+Ki67+<br>Lbl: CD4; intensity: -inf -> 175, %object 0%-30%, CD4+Ki67+<br>Lbl: all, replace with clear |
| Output                                                                                                                                                                                                                                                                                                                                                                                                                   | Densities of all classes:<br>Foxp3+ Ki67+<br>Foxp3+ Ki67-<br>CD3+ Ki67+<br>CD3+ Ki67-<br>Cd8+ Ki67+<br>Cd8+ Ki67-<br>Cd4+Ki67+<br>Cd4+Ki67-<br>% of proliferating immune cells:<br>% proliferating Foxp3<br>% proliferating CD3<br>% proliferating CD8<br>% proliderating CD4<br>Areas                                                                                                                                                                                                                                                                                                                                                                                  |

## Supplementary Figures

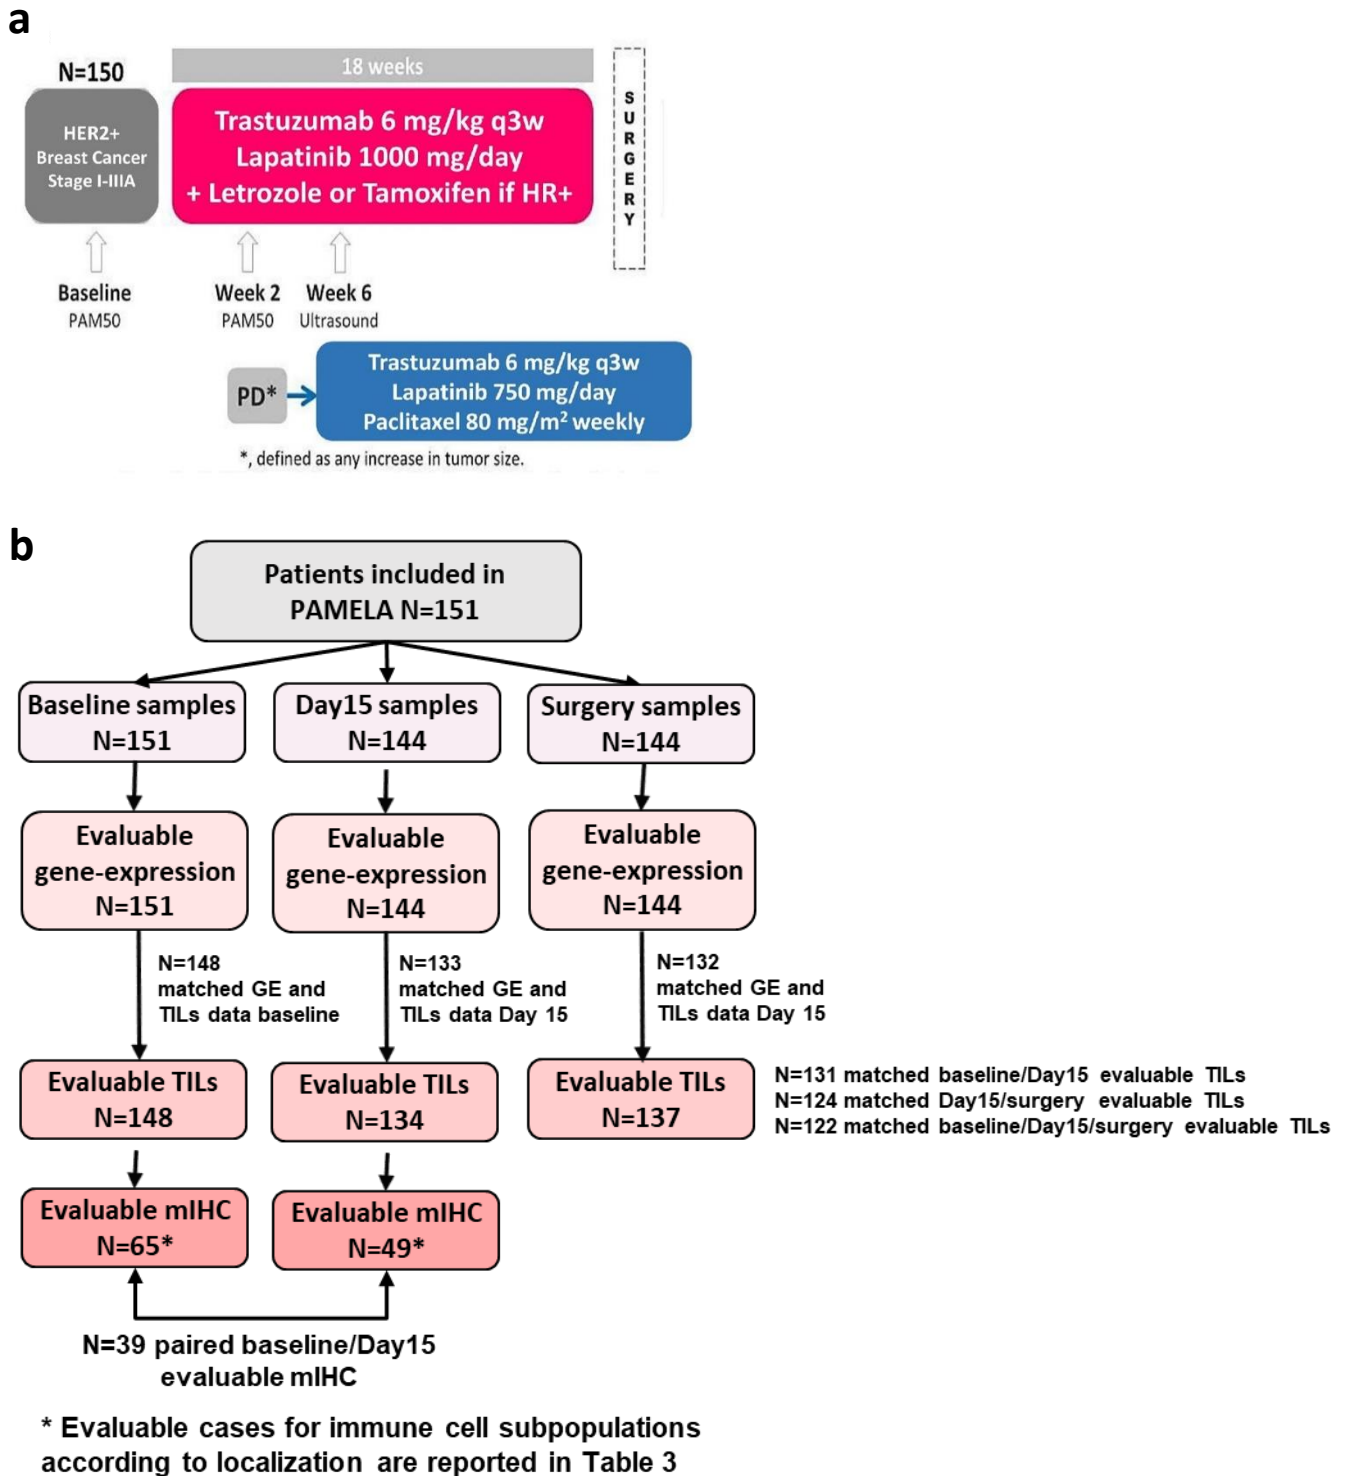

Supplementary Figure 1. PAMELA trial design (a) and REMARK diagram of biological samples evaluated in this translational trial (b)

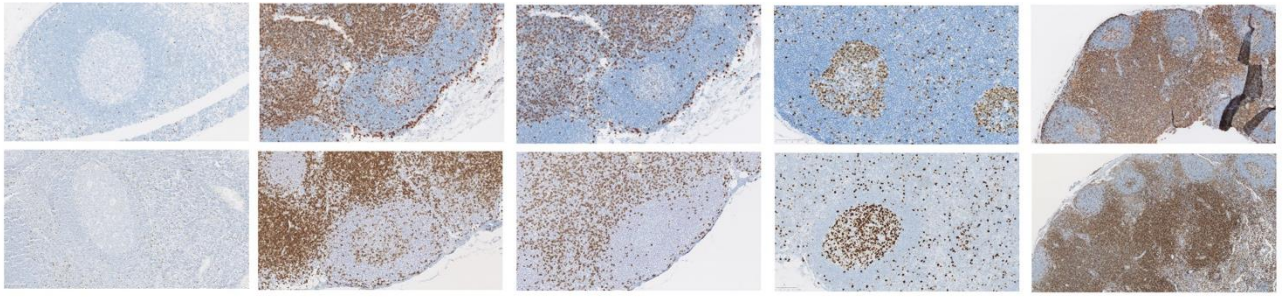

Supplementary Figure 2. Representative stainings of Foxp3, CD3, CD8, KI67 and CD4 markers (from left to right) performed with NGI technology in the upper line and with standard DAB staining in the bottom line. Foxp3, CD3, CD8 and KI67 images at 20X and CD4 images at 10X.

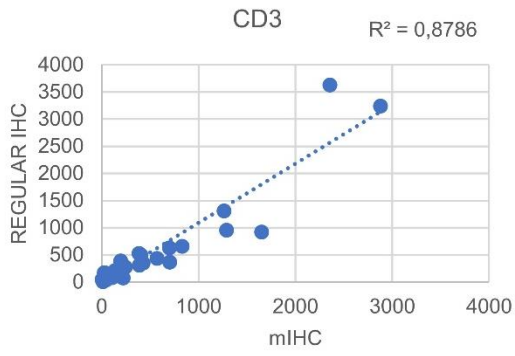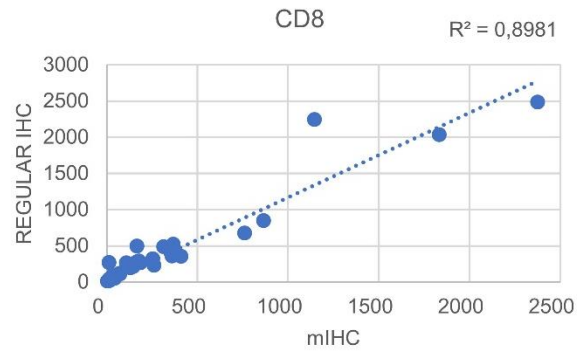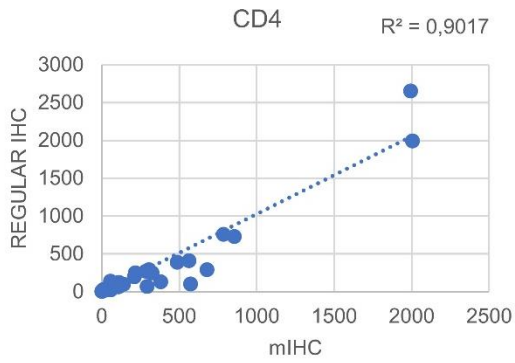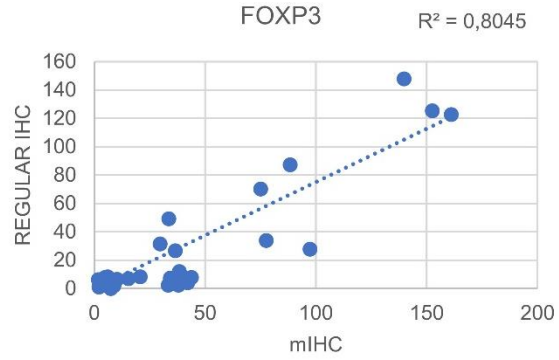

Supplementary Figure 3. Correlations of densities of different biomarkers performed with NGI technology (mIHC) and with regular IHC protocols using DAB in a subset of 30 breast cancer tumors on a tissue microarray.



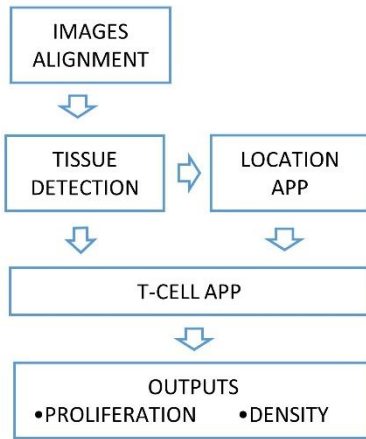

Supplementary Figure 4. Analytical pipeline of image analysis. First, obtained images are aligned. Then, an automatic tissue recognition is performed and after that the t-cell density APP is run to obtain global results. In order to obtain results separately for each of the areas, the location APP is run before the t-cell density APP.

**Baseline:**

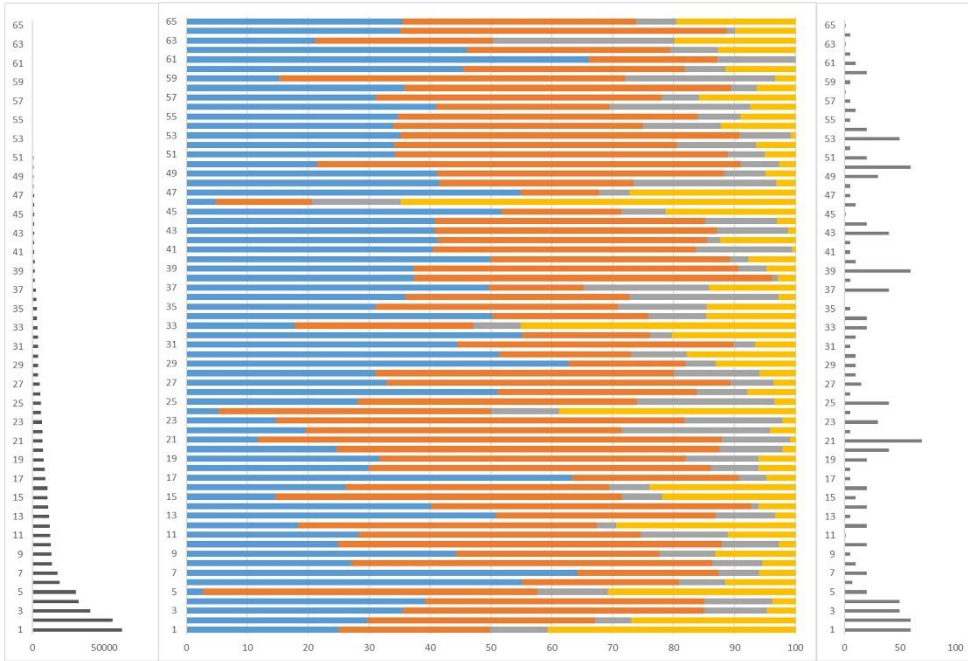

**Day 15:**

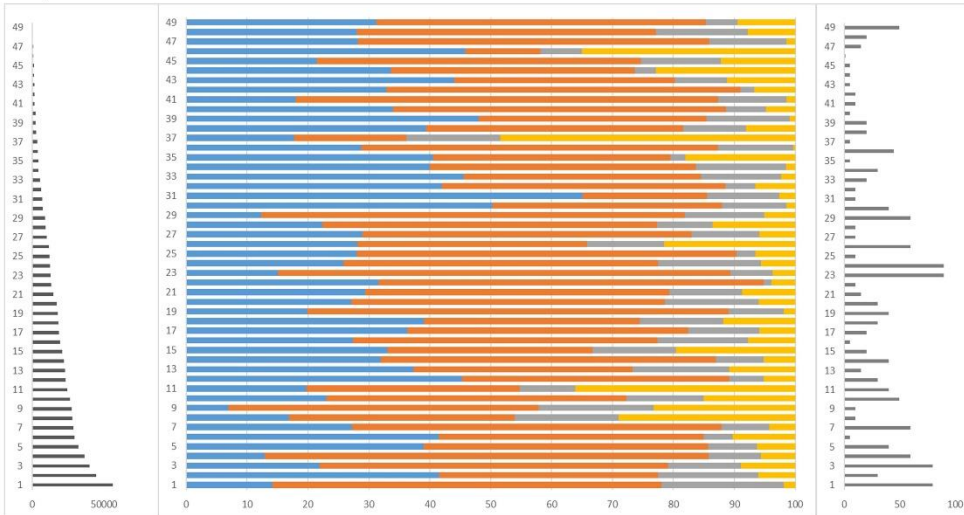

Supplementary Figure 5. CD3+ densities, proportions of CD8+ (blue), Foxp3+ (orange), CD4+ (gray) and CD3+only (yellow) cells and stromal tumor infiltrating lymphocytes (TILs) separated by baseline and day15 samples.

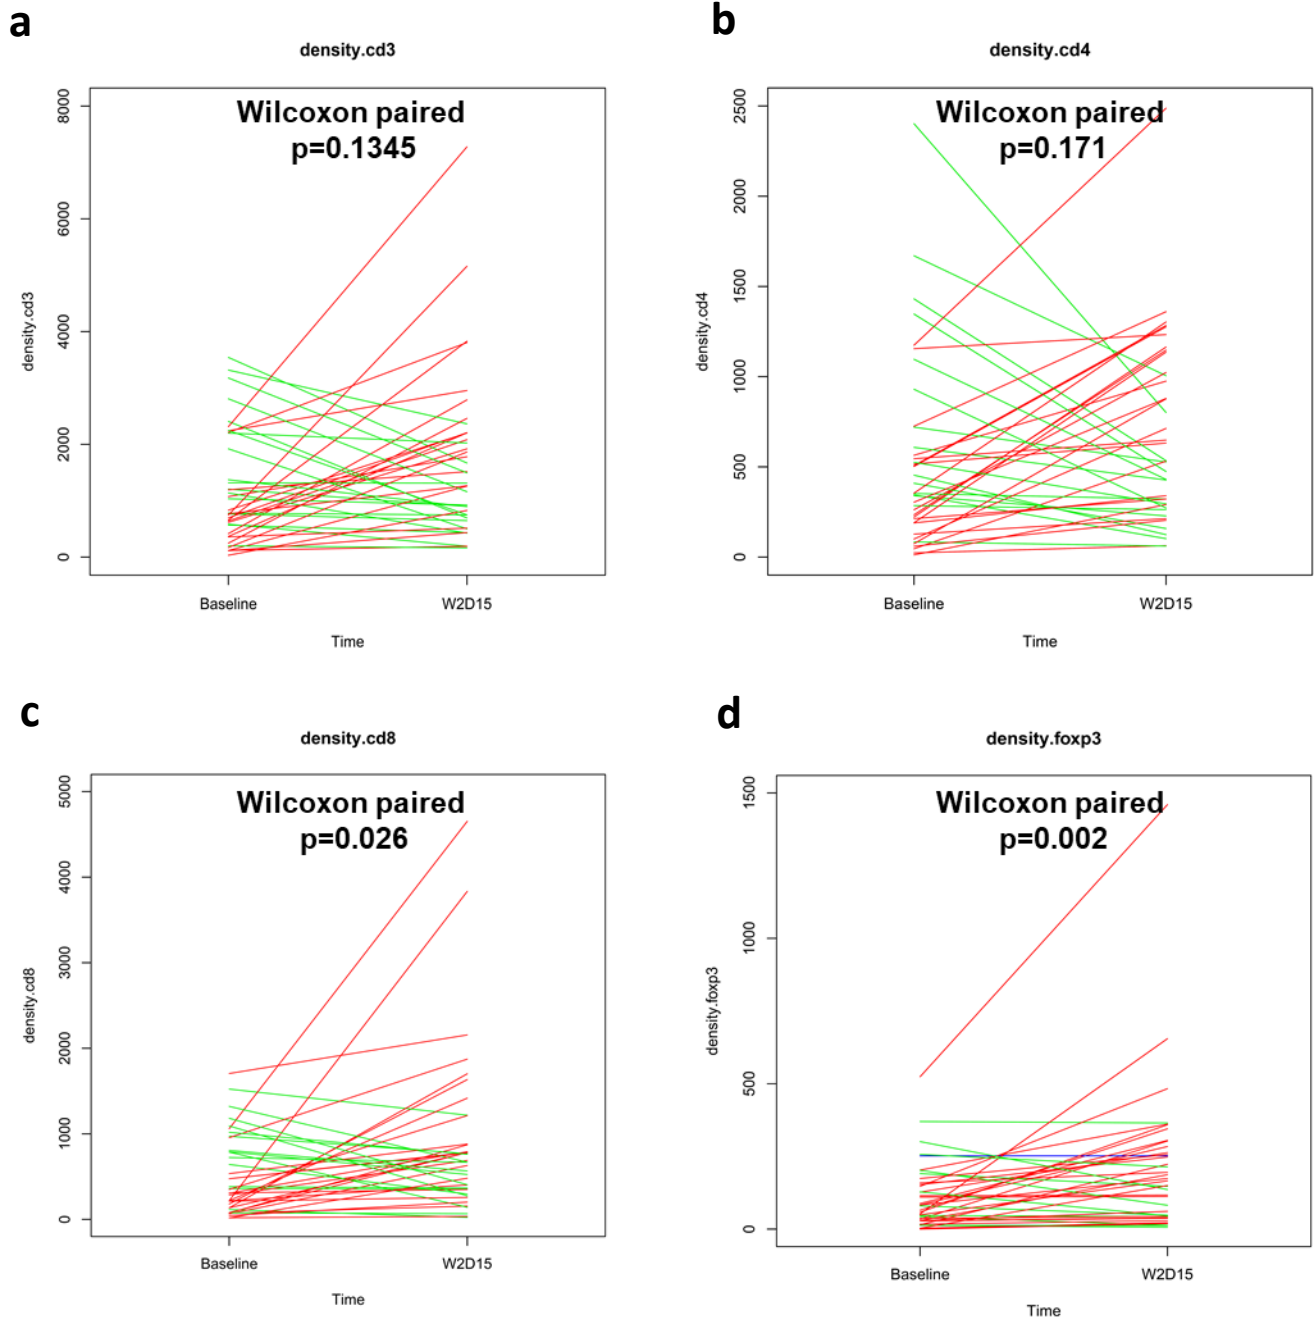

Supplementary Figure 6. Two-point graphs showing individual patient immune cell density data from baseline to Day 15 for the 39 patients with paired samples: CD3 (a); CD4 (b); CD8 (c); Foxp3 (d).

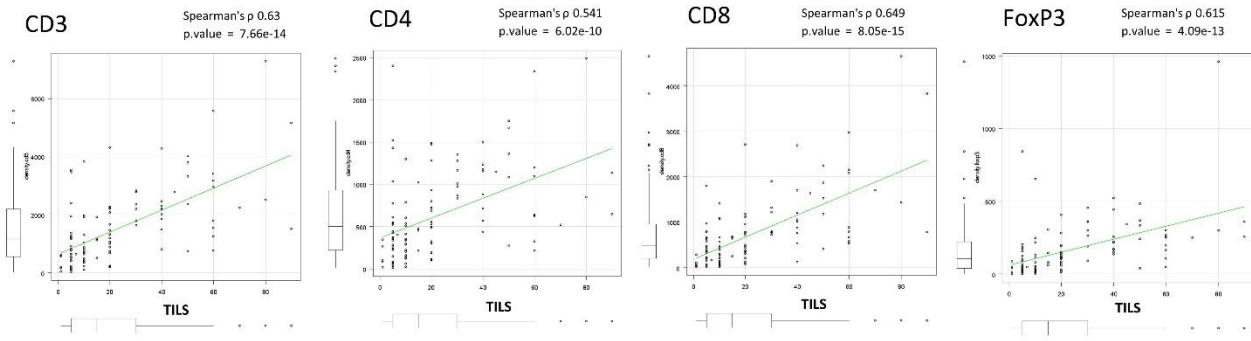

Supplementary Figure 7. Scatter plots showing the correlation between immune cell densities (CD3+, CD4+, CD8+ and Foxp3+) and TILs. Box-plot of immune cell densities and TILs are shown next to the y and x axis, respectively.

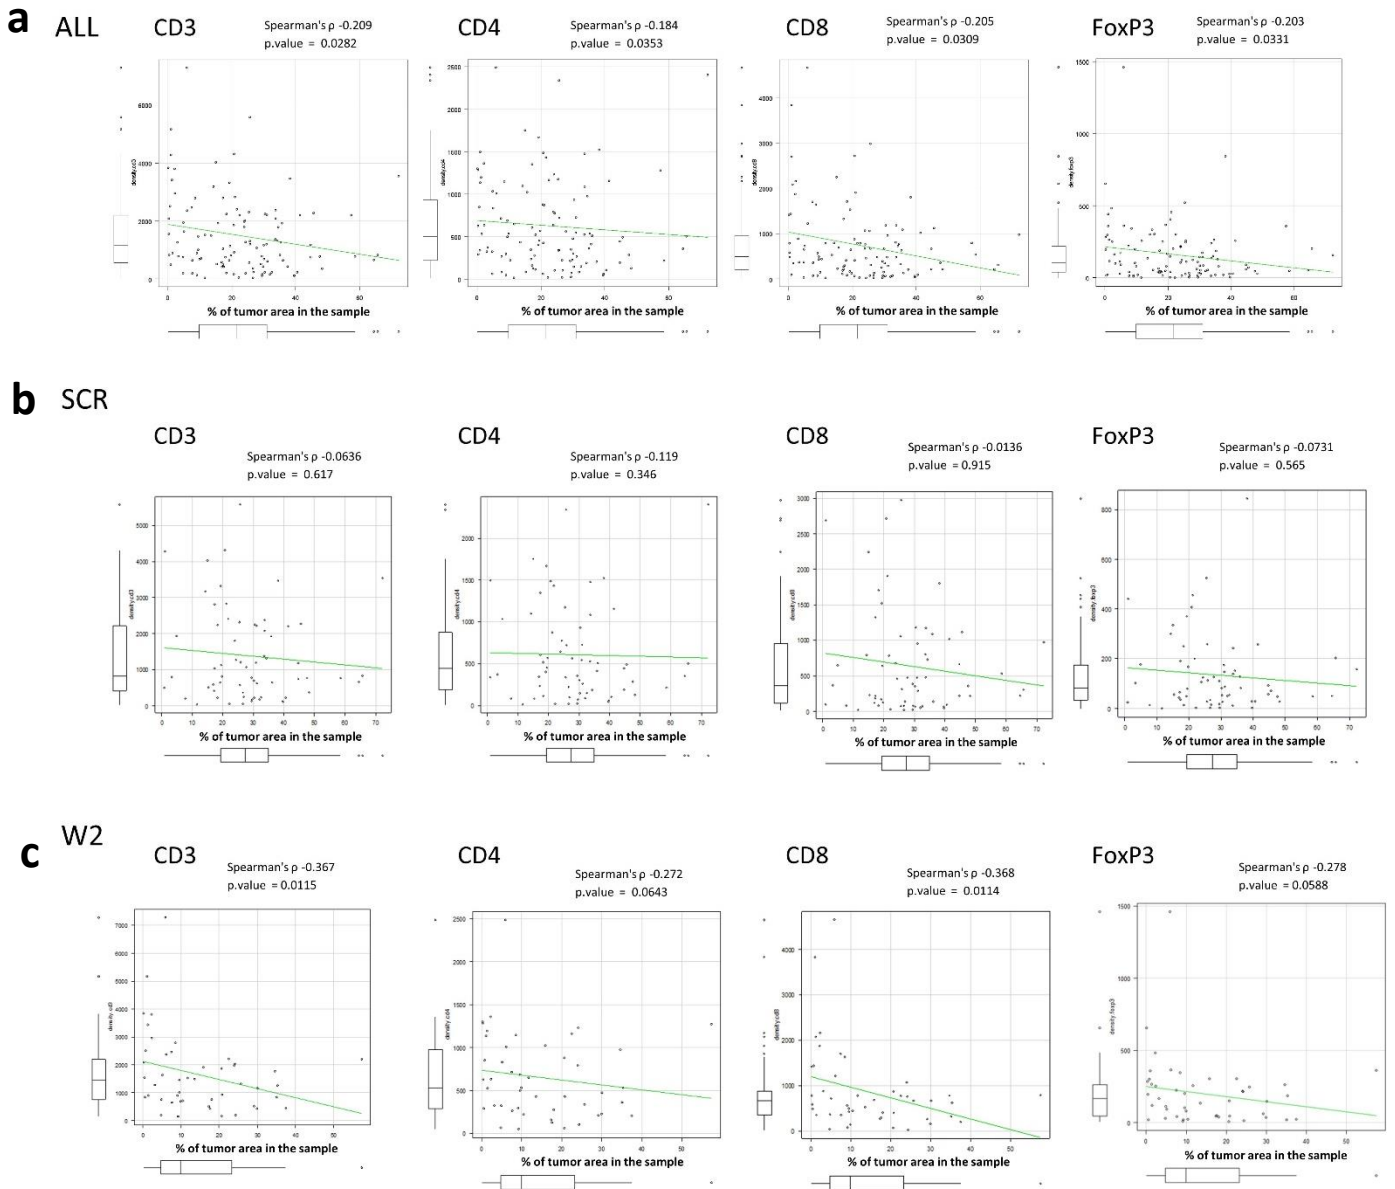

Supplementary Figure 8. Scatter plots showing the correlation between immune cell densities (CD3+, CD4+, CD8+ and Foxp3+) and percentage of tumor area in the sample. Box-plot of immune cell densities and percentage of tumor area in the sample are shown next to the y and x axis, respectively. a, all samples, b, baseline samples and c, Day 15 samples.

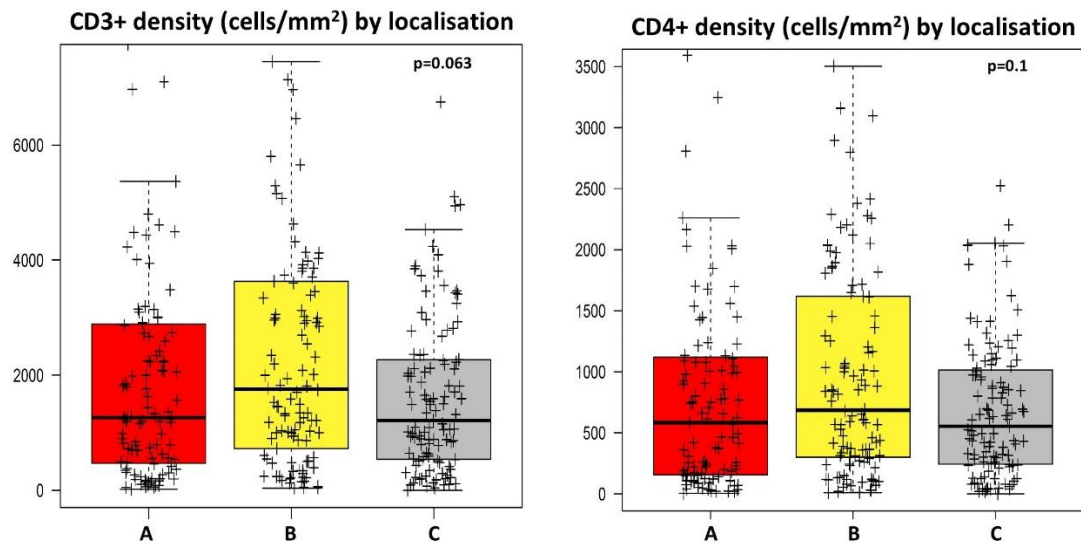

Supplementary Figure 9. Box-plots of immune cells densities (CD3+and CD4+) according to spatial location. Boxplot legend: centre line: median; bounds of box: interquartile range (IQR); whiskers: highest and lowest value excluding outliers ( $Q3+1.5*IQR$  to  $Q1-1.5*IQR$ ); markers beyond the whiskers: potential outliers.

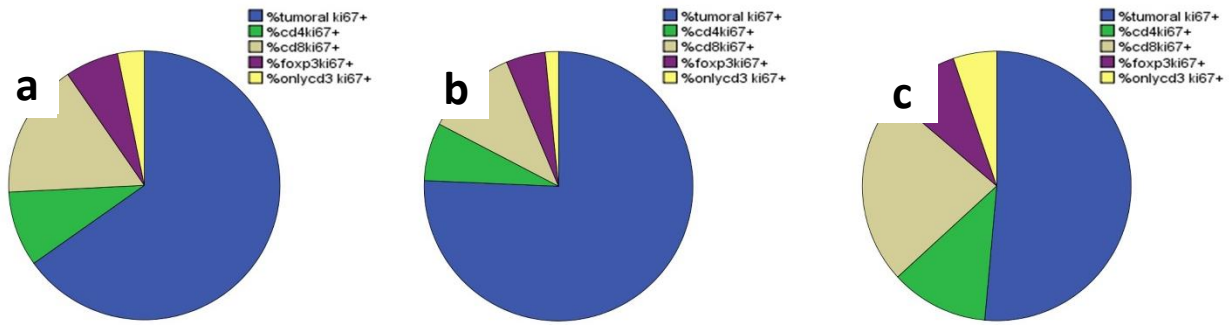

Supplementary Figure 10. Pie chart showing the proportion of proliferating cells over the total proliferating cells in the tumor samples. Tumoral cells in blue, CD4 in green, CD8 in gray, Foxp3 in purple and CD3 only in yellow. a for all the samples, b for baseline samples and c for Day15 samples.

**a ALL**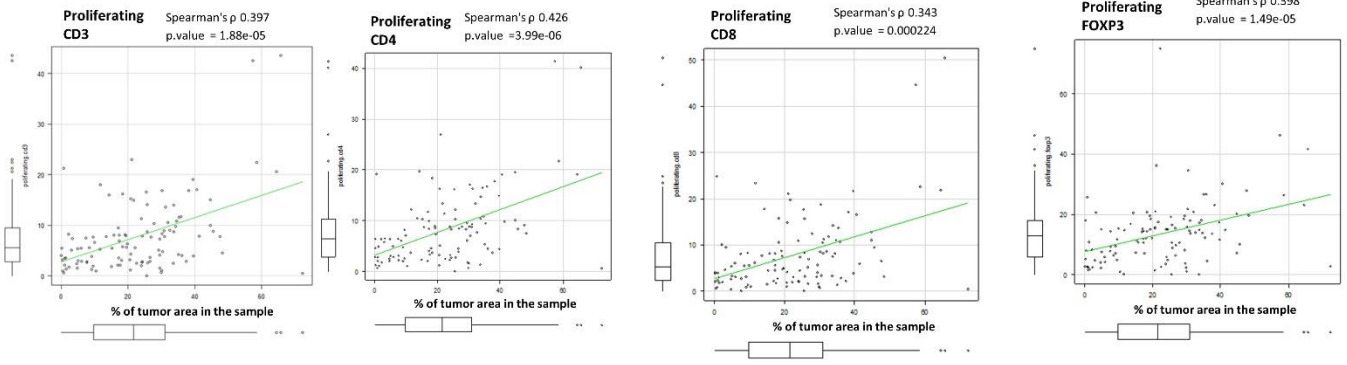**b SCR**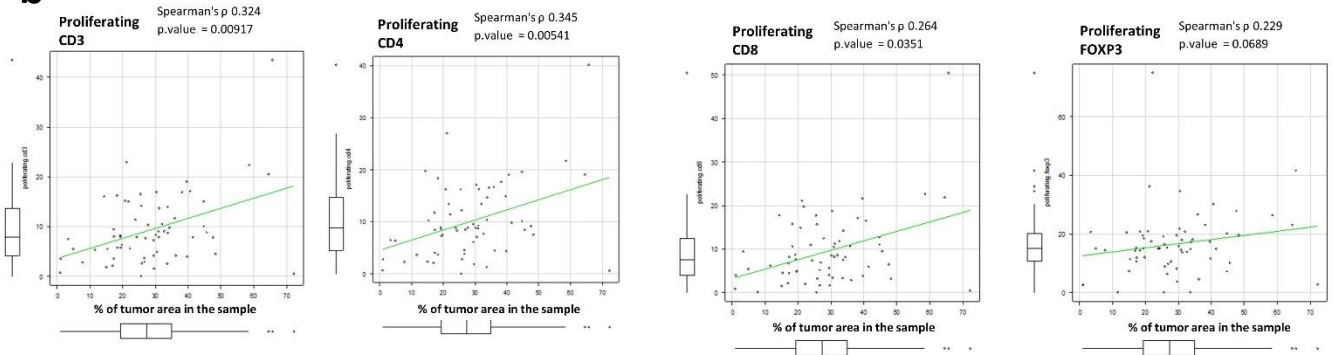**c W2**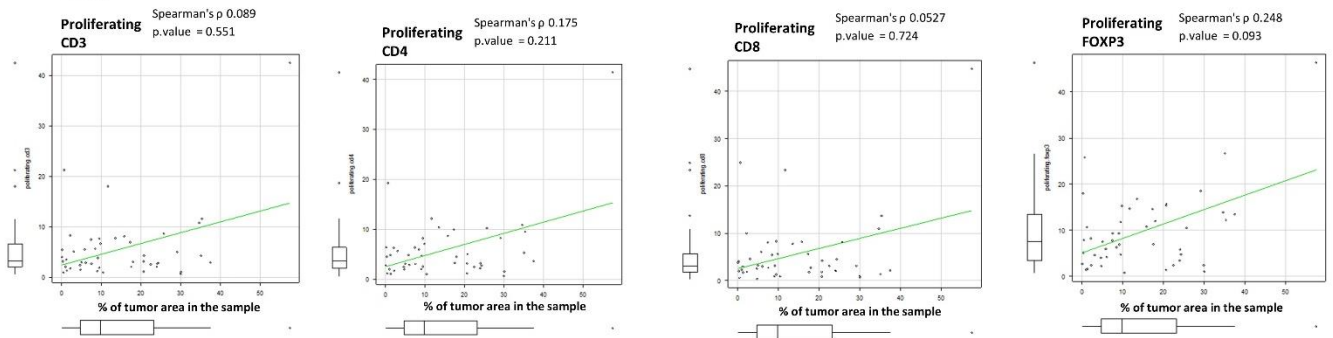

Supplementary Figure 11. Scattered plots of the proportion of proliferating cells (CD3+, CD4+, CD8+ and Foxp3+) and tumoral areas. Box-plot of the proportion of proliferating cells and tumoral areas are shown next to the y and x axis, respectively. a for all the samples, b for baseline samples and c for Day 15 samples.



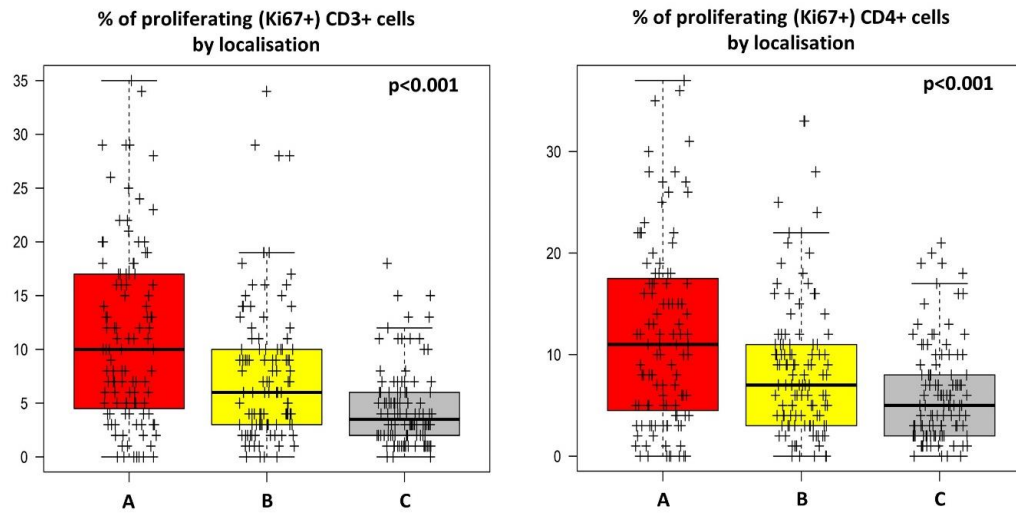

Supplementary Figure 12. Box-plots of the proportion of proliferating immune cells (CD3+ and CD4+) according to spatial location. Boxplot legend: centre line: median; bounds of box: interquartile range (IQR); whiskers: highest and lowest value excluding outliers ( $Q3+1.5 \cdot IQR$  to  $Q1-1.5 \cdot IQR$ ); markers beyond the whiskers: potential outliers.

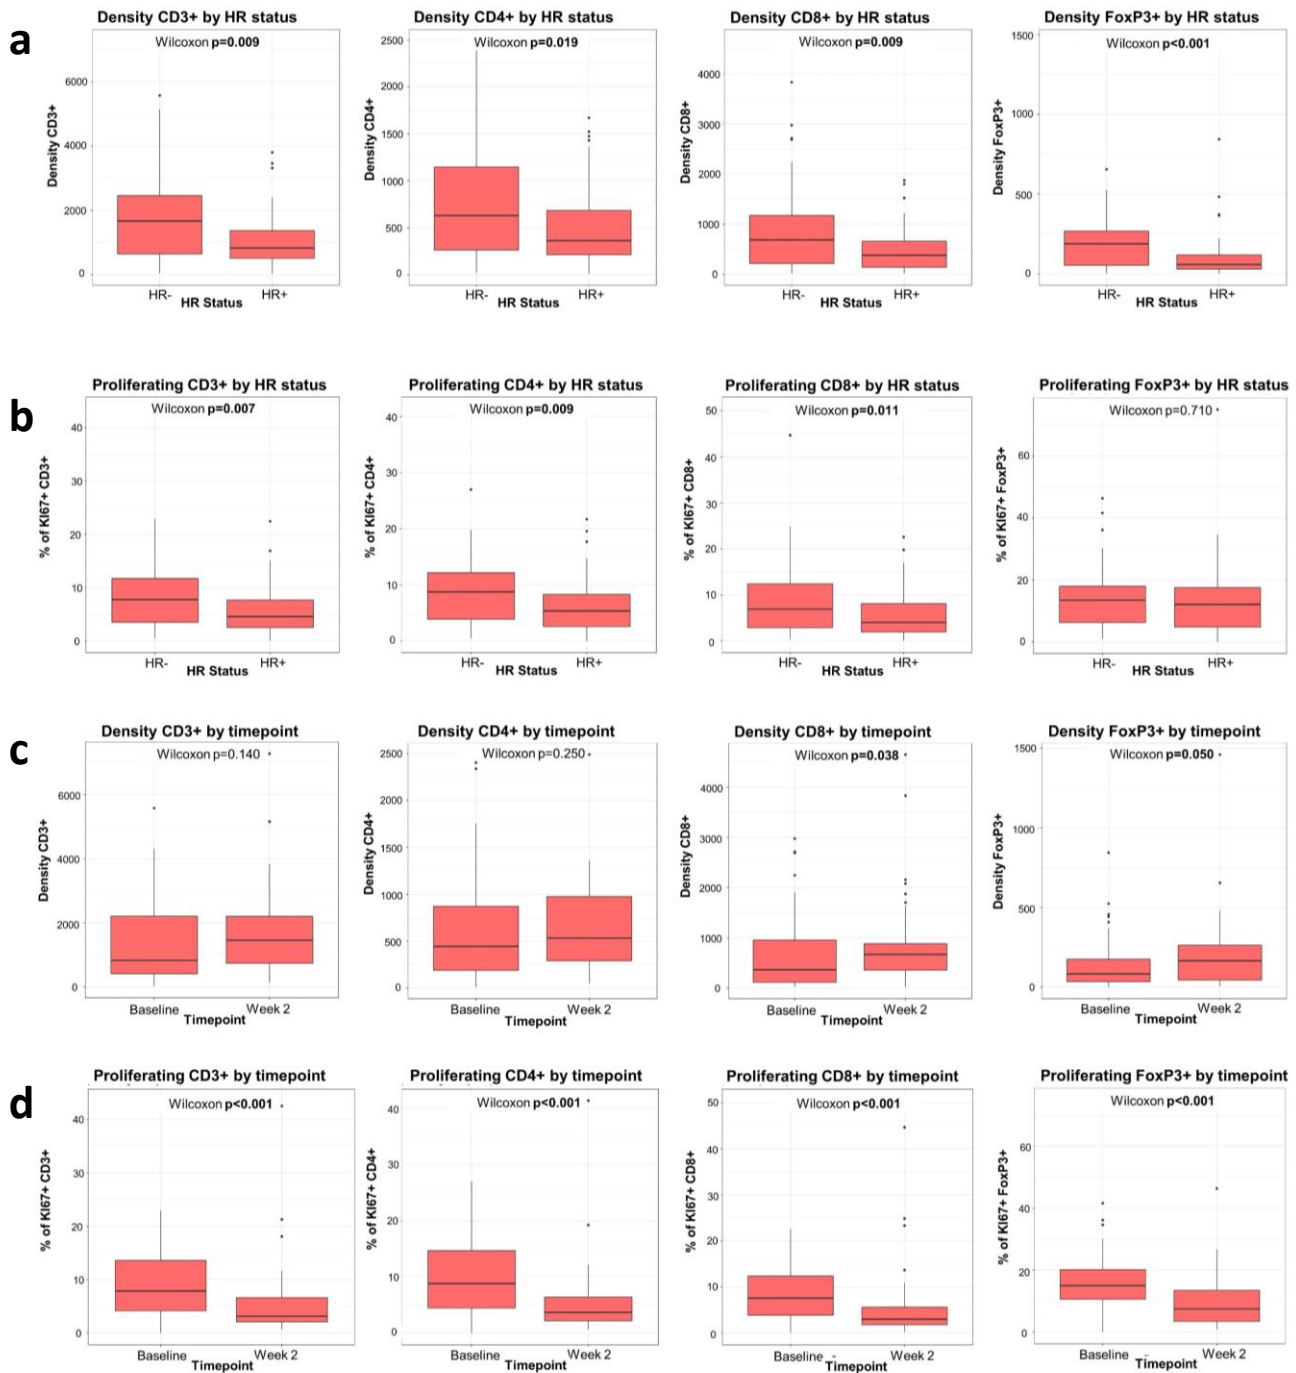

Supplementary Figure 13. Box-plots of immune cell densities (CD3+, CD4+, CD8+ and Foxp3+) and percentage of proliferating immune cells (CD3+, CD4+, CD8+ and Foxp3+) according to HR status (a and b, respectively) and according to timepoint (c and d, respectively). Boxplot legend: centre line: median; bounds of box: interquartile range (IQR); whiskers: highest and lowest value excluding outliers ( $Q3+1.5*IQR$  to  $Q1-1.5*IQR$ ); markers beyond the whiskers: potential outliers.

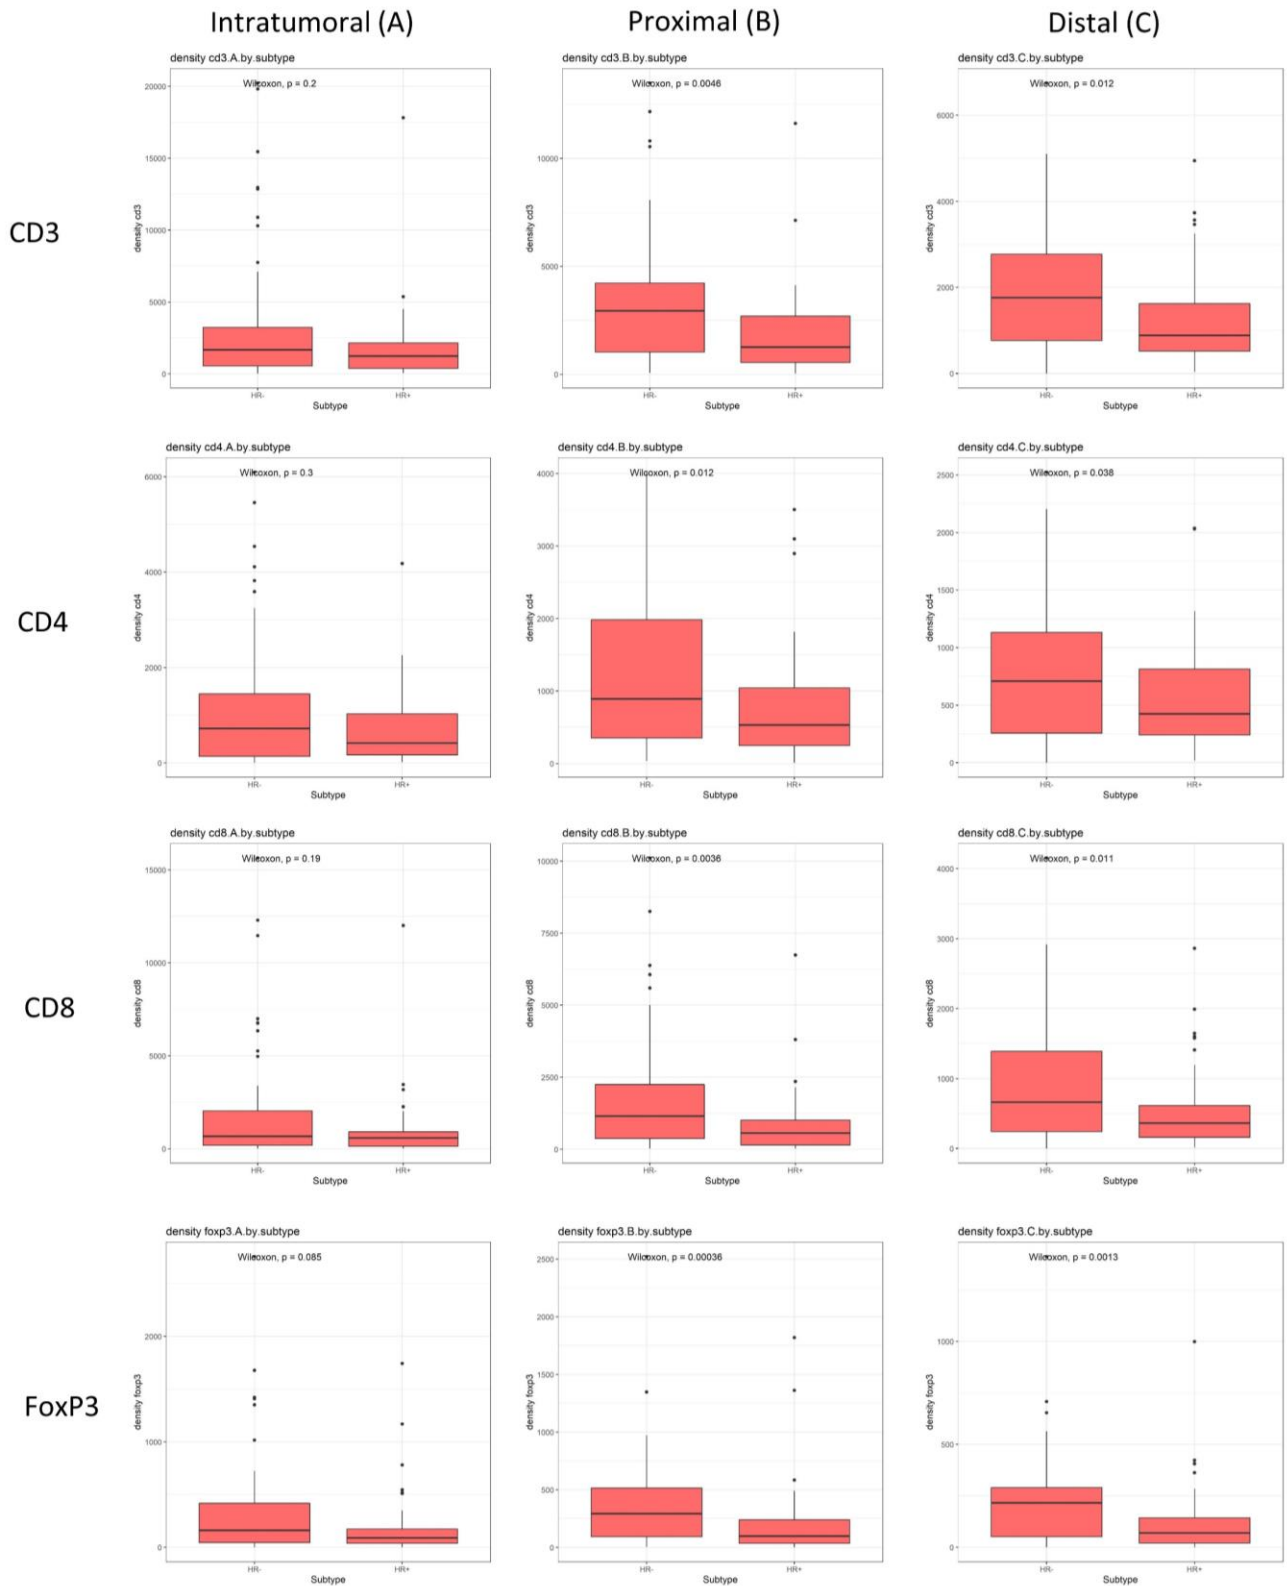

Supplementary Figure 14. Box-plots of immune cell densities (CD3+, CD4+, CD8+ and Foxp3+) by HR status in intratumoral (A), proximal (B) and distal (C) locations. Boxplot legend: centre line: median; bounds of box: interquartile range (IQR); whiskers: highest and lowest value excluding outliers ( $Q3+1.5 \cdot IQR$  to  $Q1-1.5 \cdot IQR$ ); markers beyond the whiskers: potential outliers.

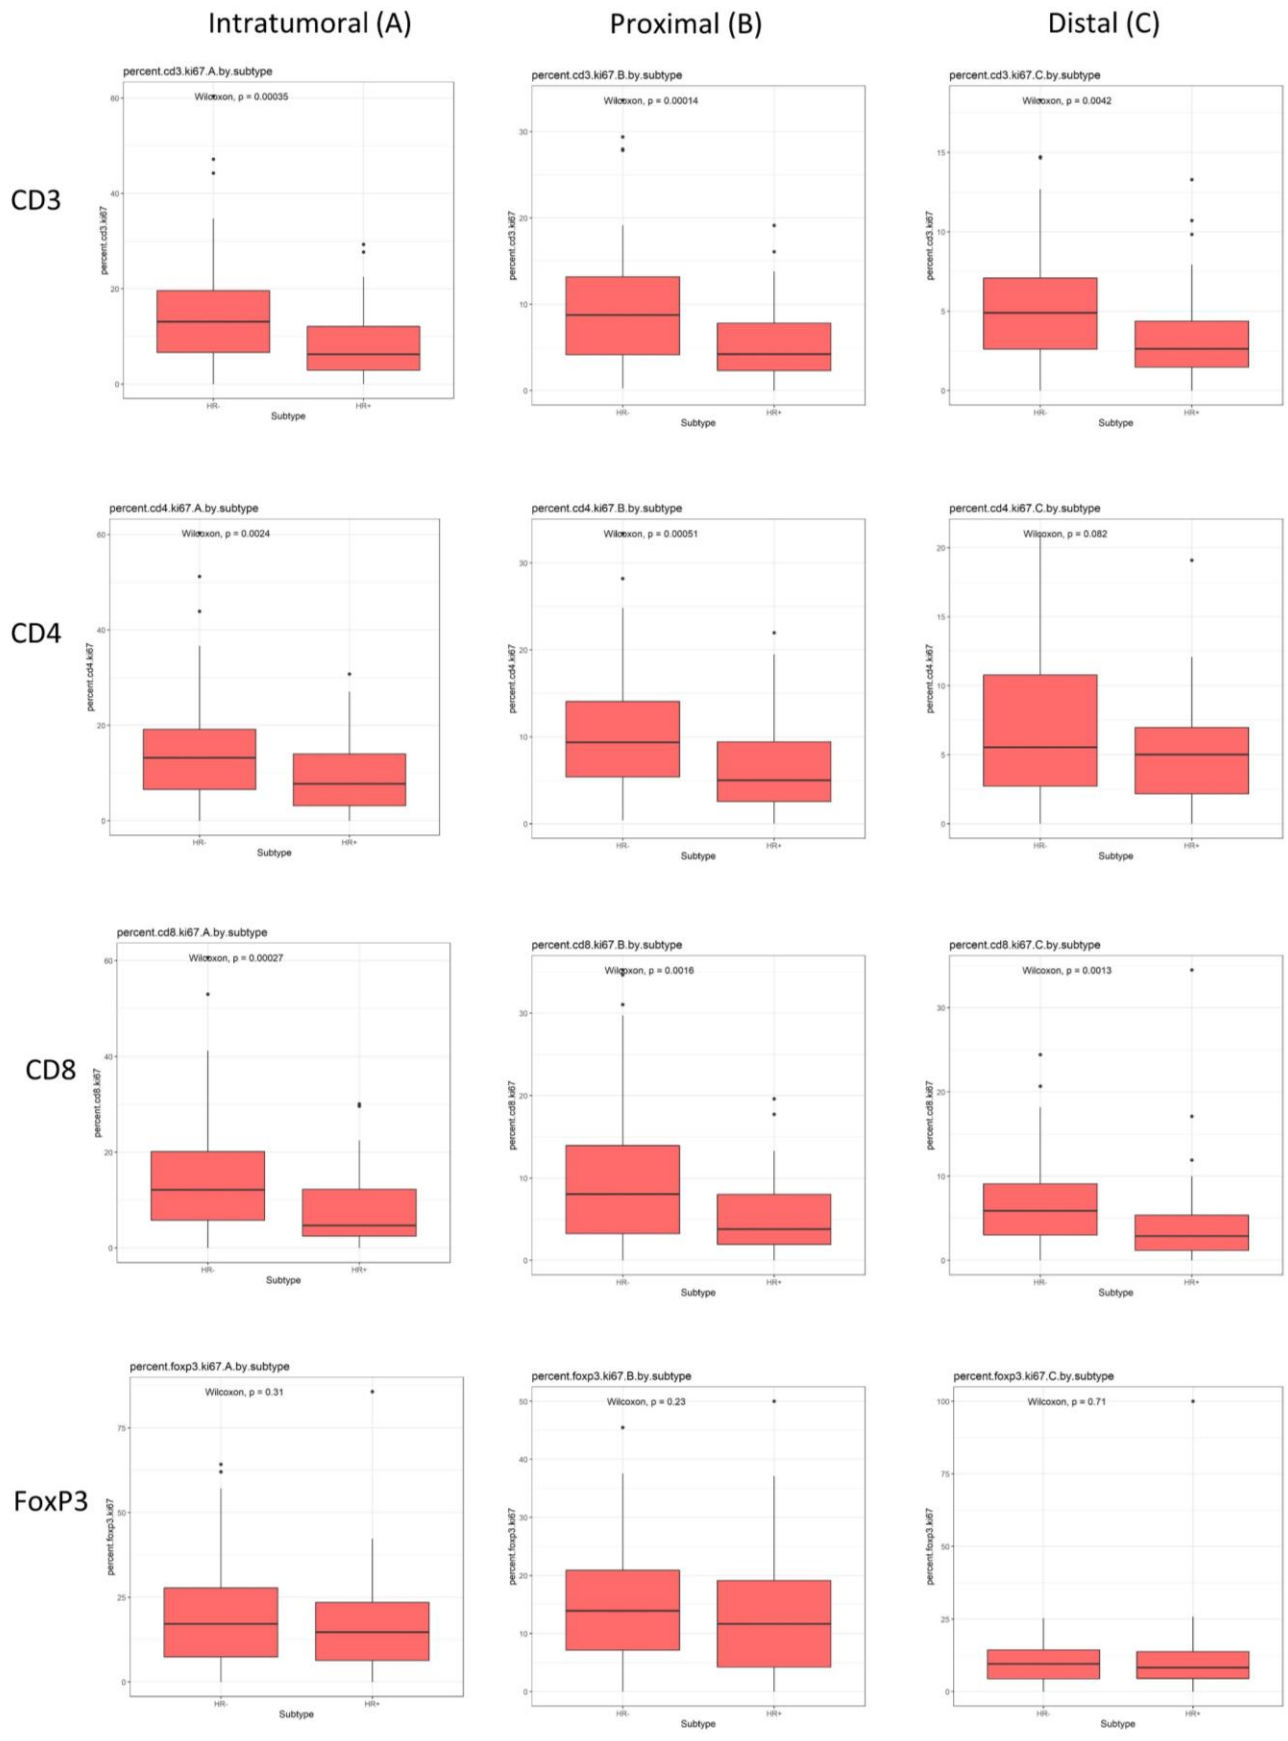

Supplementary Figure 15. Box-plots of percentage of proliferating immune cells (CD3+, CD4+, CD8+ and Foxp3+) by HR status in intratumoral (A), proximal (B) and distal (C) locations. Boxplot legend: centre line: median; bounds of box: interquartile range (IQR); whiskers: highest and lowest value excluding outliers ( $Q3+1.5 \times IQR$  to  $Q1-1.5 \times IQR$ ); markers beyond the whiskers: potential outliers.

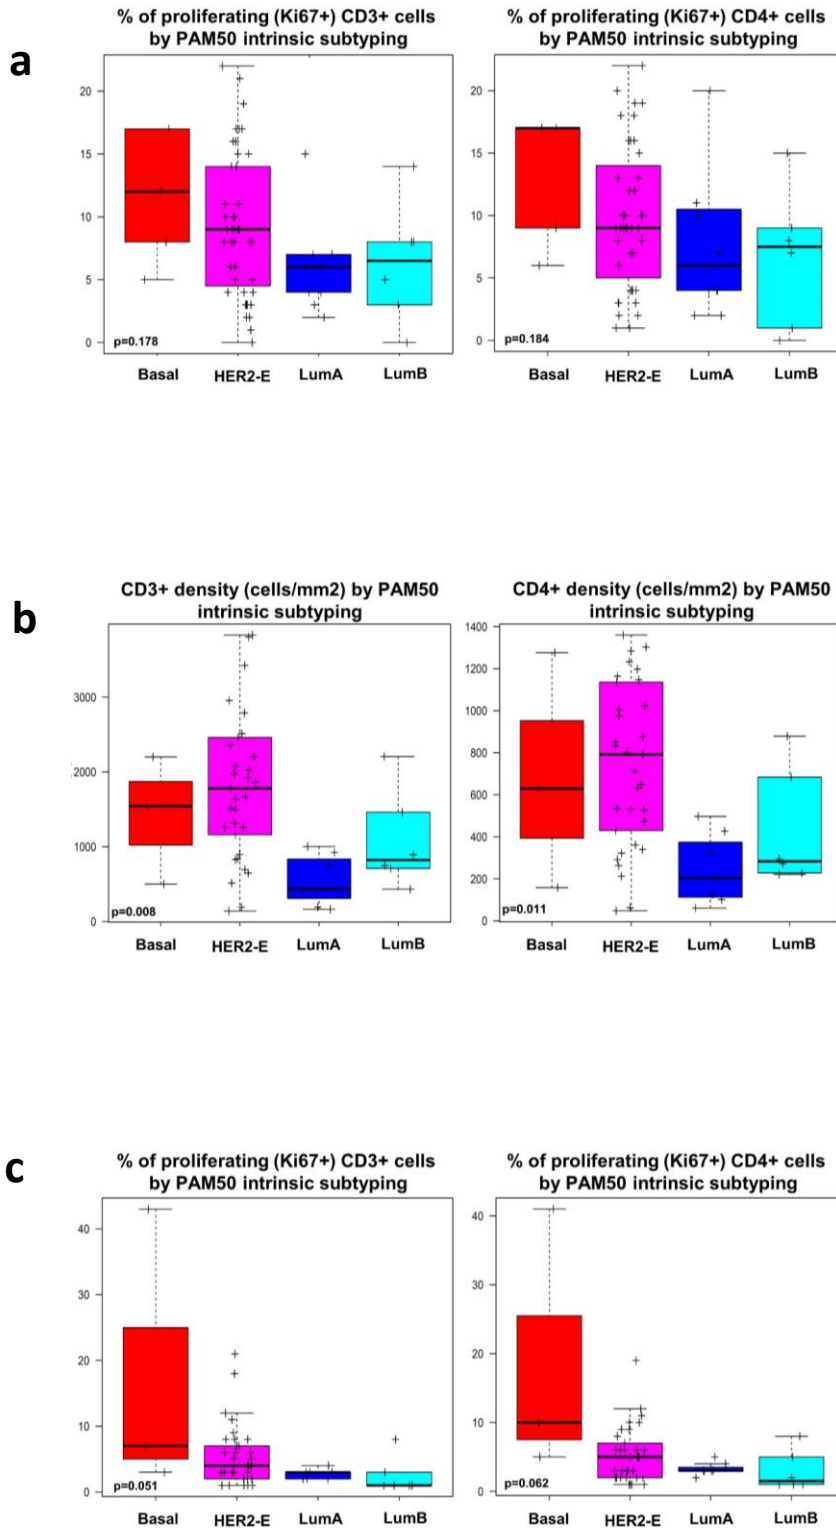

Supplementary Figure 16. Immune cell density according to intrinsic subtype

Supplementary Figure 16a. Box-plots of the proportion of proliferating immune cells (CD3<sup>+</sup>, CD4<sup>+</sup>) at baseline according to baseline intrinsic subtyping.

Supplementary Figure 16b. Box-plots of immune cells densities (CD3<sup>+</sup>, CD4<sup>+</sup>) at day 15 according to baseline intrinsic subtyping.

Supplementary Figure 16c. Box-plots of the proportion of proliferating immune cells (CD3<sup>+</sup>, CD4<sup>+</sup>) at day 15 according to baseline intrinsic subtyping.

Boxplot legend: centre line: median; bounds of box: interquartile range (IQR); whiskers: highest and lowest value excluding outliers (Q3+1.5\*IQR to Q1-1.5\*IQR); markers beyond the whiskers: potential outliers.

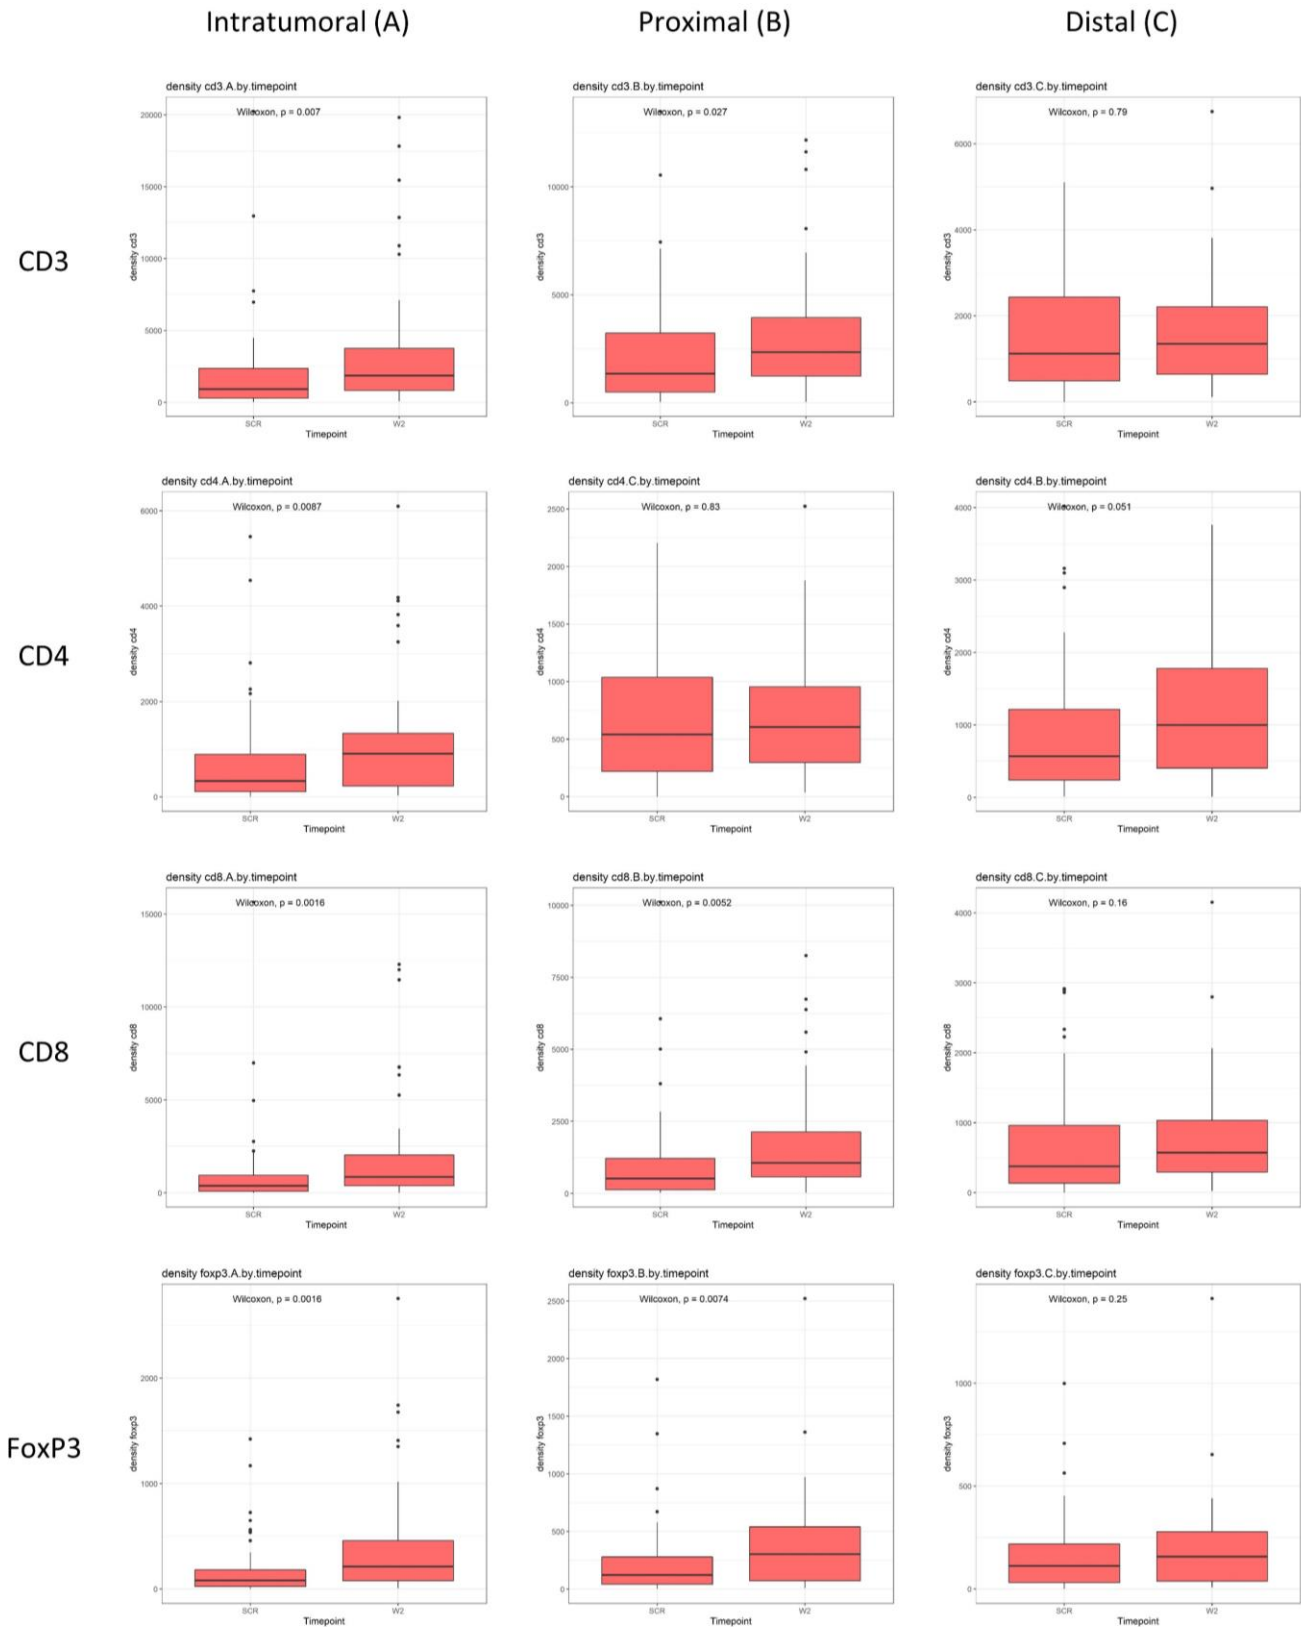

Supplementary Figure 17. Box-plots of immune cell densities (CD3+, CD4+, CD8+ and Foxp3+) by timepoint in intratumoral (A), proximal (B) and distal (C) locations. Boxplot legend: centre line: median; bounds of box: interquartile range (IQR); whiskers: highest and lowest value excluding outliers ( $Q3+1.5 \cdot IQR$  to  $Q1-1.5 \cdot IQR$ ); markers beyond the whiskers: potential outliers.

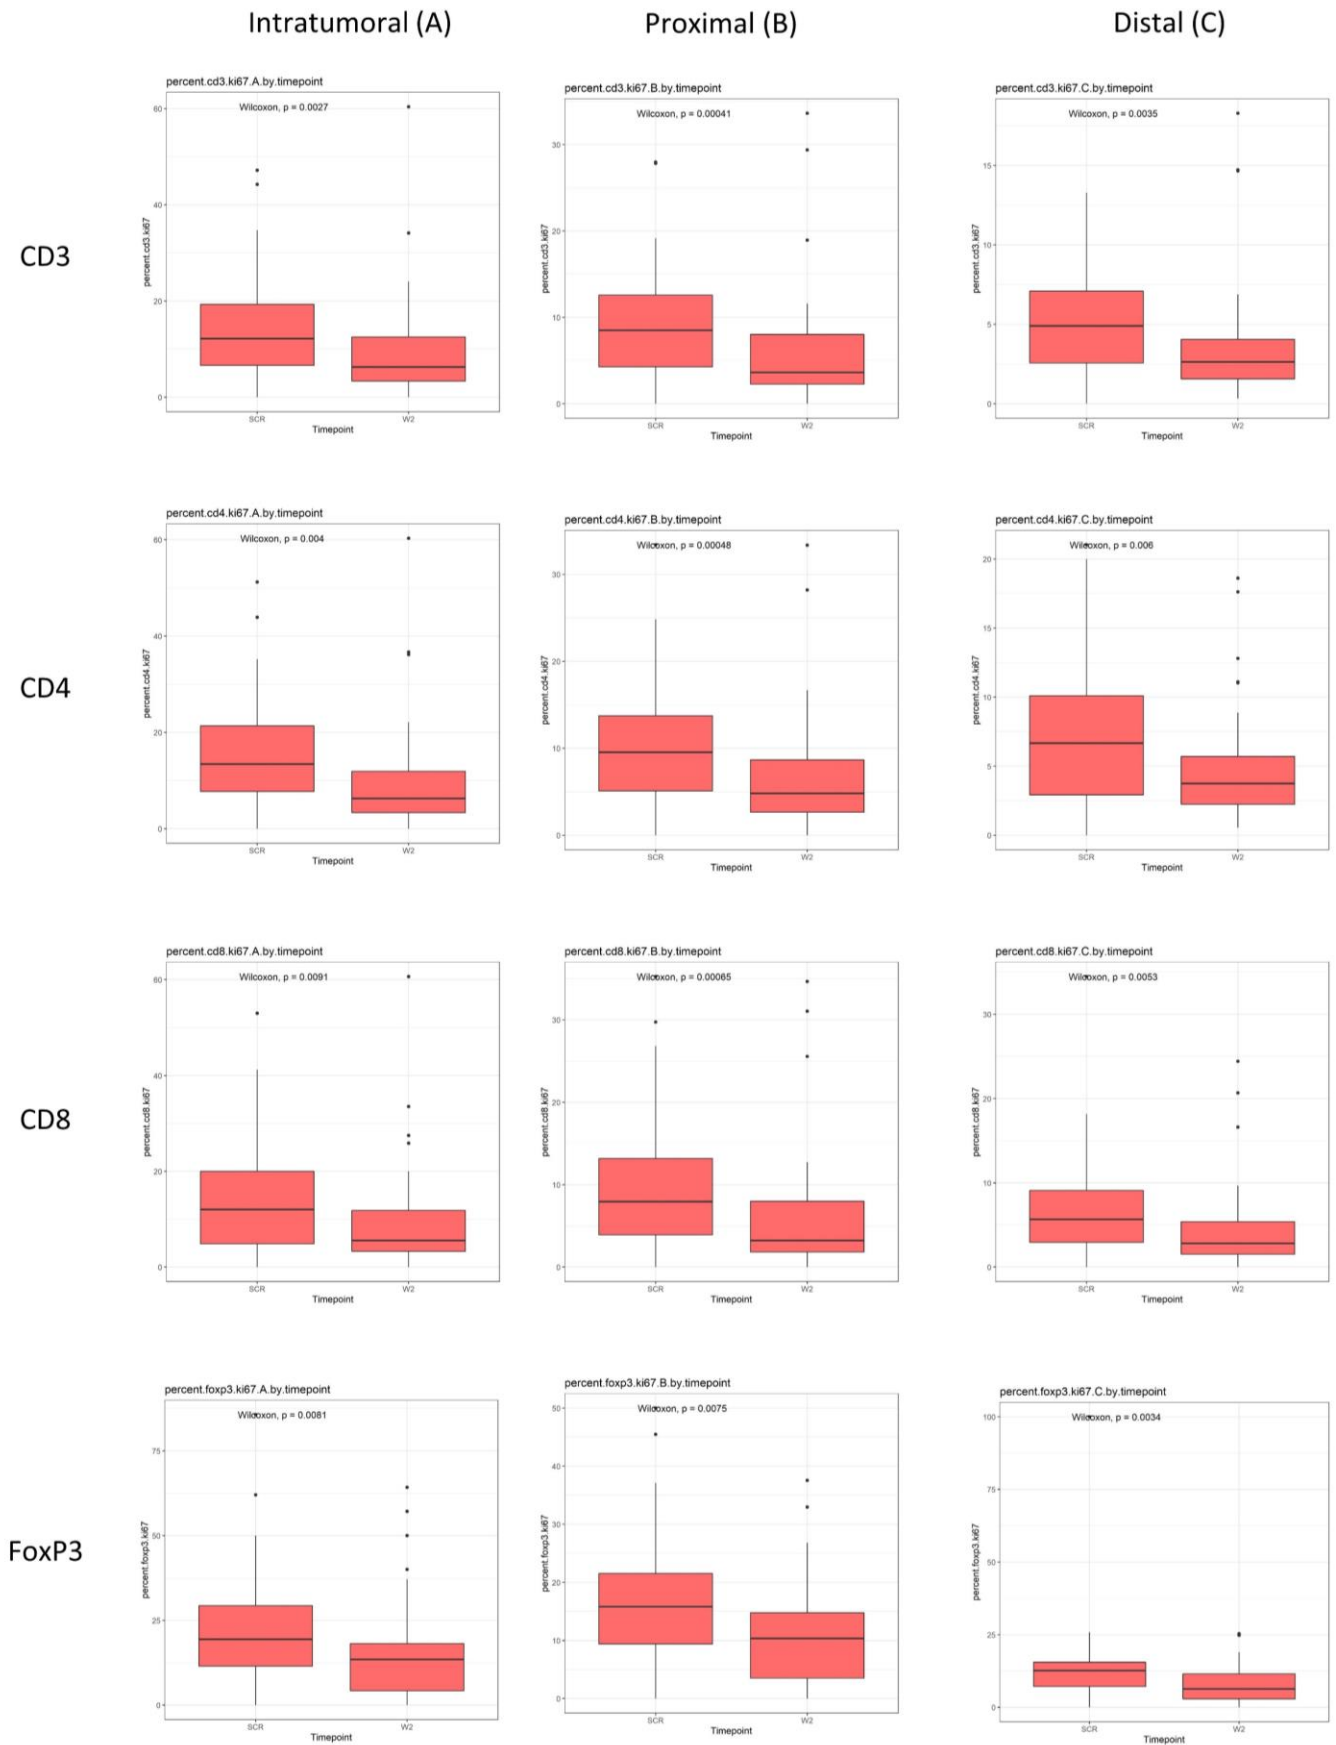

Supplementary Figure 18. Box-plots of percentage of proliferating immune cells (CD3+, CD4+, CD8+ and Foxp3+) by timepoint in intratumoral (A), proximal (B) and distal (C) locations. Boxplot legend: centre line: median; bounds of box: interquartile range (IQR); whiskers: highest and lowest value excluding outliers ( $Q3+1.5*IQR$  to  $Q1-1.5*IQR$ ); markers beyond the whiskers: potential outliers.

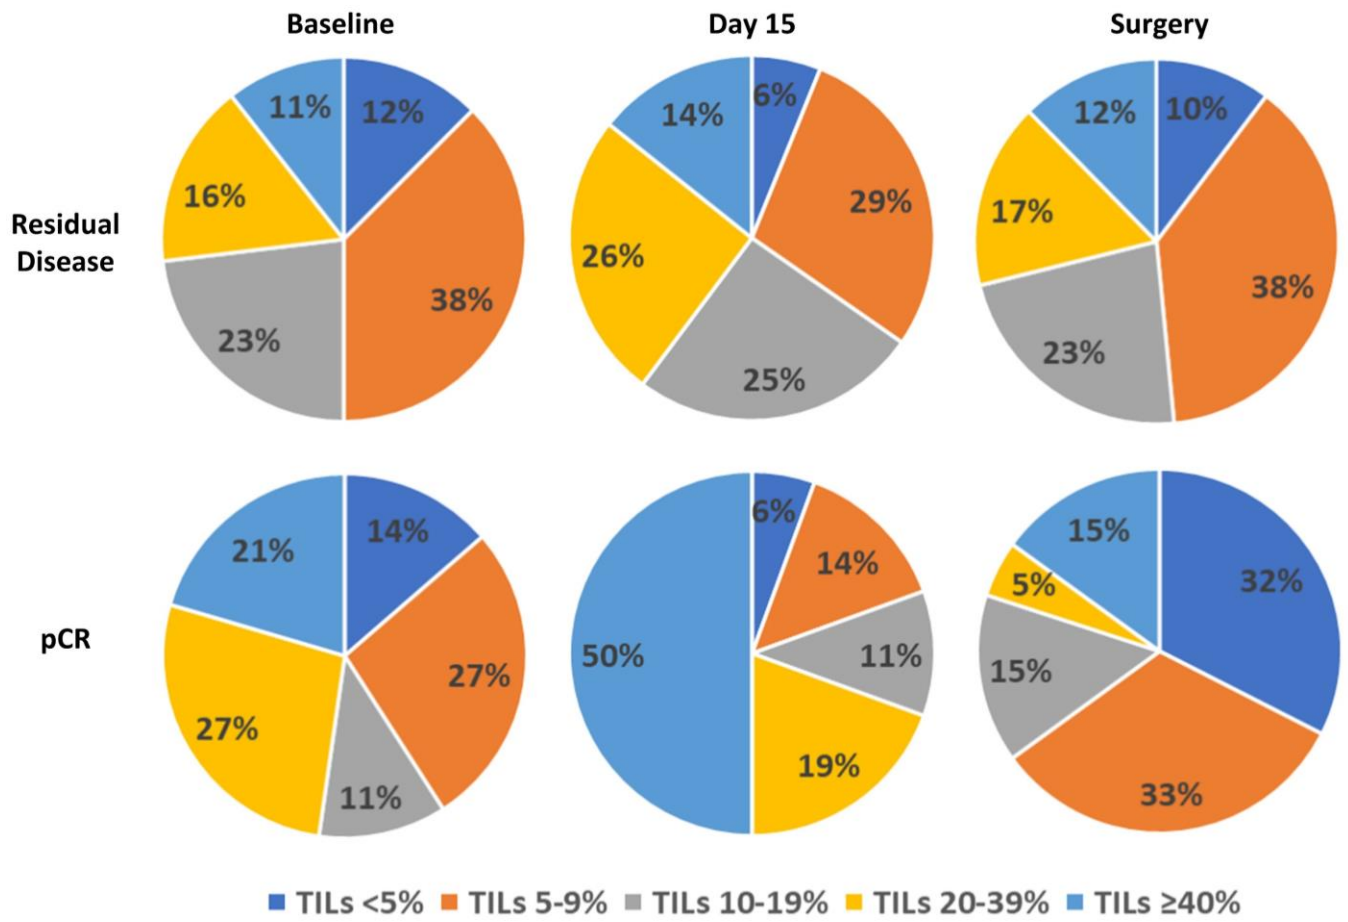

Supplementary Figure 19. Distribution of sTIL levels at the three timepoints according to pathological response (pCR versus residual disease).



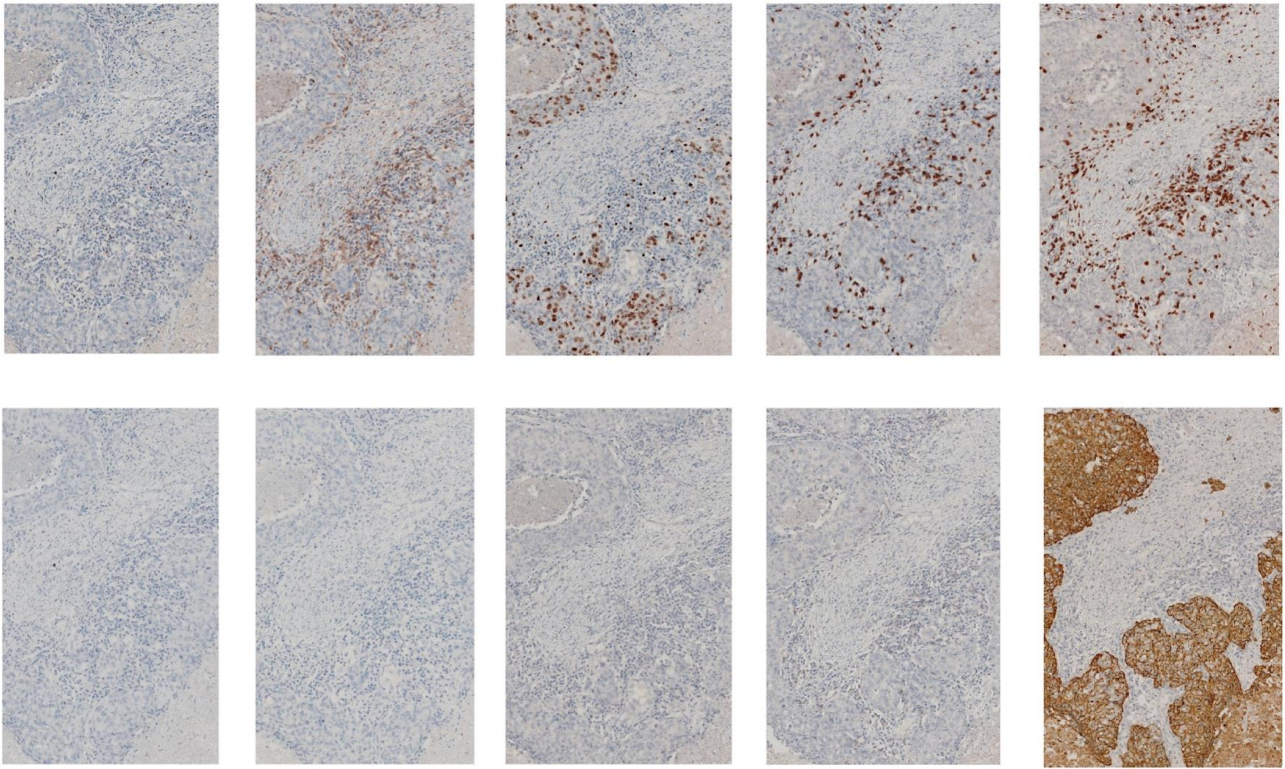

Supplementary Figure 20. Sequential staining of Foxp3, CD4, KI67, CD8 and CD3 on the same tissue slide (top panel, from left to right). In the bottom panel, an intermediate step in-between two target stainings where the primary antibody was omitted shows the absence of cross-reactivity. The last staining shows a cytokeratin after CD3 staining for tumor mask. Images at 4X.
