# Supplementary material for: Immune microenvironment characterisation and dynamics during anti-HER2-based neoadjuvant treatment in HER2-positive breast cancer
Source: PubMed Central journal article supplement (PMC7979716; doi:10.1038/s41698-021-00163-6), 2021-03-19
Supplement: 41698_2021_163_MOESM2_ESM.pdf [file 41698_2021_163_MOESM2_ESM.pdf]

## Reporting Summary

Nature Research wishes to improve the reproducibility of the work that we publish. This form provides structure for consistency and transparency in reporting. For further information on Nature Research policies, see our [Editorial Policies](#) and the [Editorial Policy Checklist](#).

### Statistics

For all statistical analyses, confirm that the following items are present in the figure legend, table legend, main text, or Methods section.

n/a Confirmed

- The exact sample size ( $n$ ) for each experimental group/condition, given as a discrete number and unit of measurement
- A statement on whether measurements were taken from distinct samples or whether the same sample was measured repeatedly
- The statistical test(s) used AND whether they are one- or two-sided  
*Only common tests should be described solely by name; describe more complex techniques in the Methods section.*
- A description of all covariates tested
- A description of any assumptions or corrections, such as tests of normality and adjustment for multiple comparisons
- A full description of the statistical parameters including central tendency (e.g. means) or other basic estimates (e.g. regression coefficient) AND variation (e.g. standard deviation) or associated estimates of uncertainty (e.g. confidence intervals)
- For null hypothesis testing, the test statistic (e.g.  $F$ ,  $t$ ,  $r$ ) with confidence intervals, effect sizes, degrees of freedom and  $P$  value noted  
*Give  $P$  values as exact values whenever suitable.*
- For Bayesian analysis, information on the choice of priors and Markov chain Monte Carlo settings
- For hierarchical and complex designs, identification of the appropriate level for tests and full reporting of outcomes
- Estimates of effect sizes (e.g. Cohen's  $d$ , Pearson's  $r$ ), indicating how they were calculated

*Our web collection on [statistics for biologists](#) contains articles on many of the points above.*

### Software and code

Policy information about [availability of computer code](#)

Data collection All statistical analyses were performed using the R software 3.6.1.

Data analysis All statistical analyses were performed using the R software 3.6.1.

For manuscripts utilizing custom algorithms or software that are central to the research but not yet described in published literature, software must be made available to editors and reviewers. We strongly encourage code deposition in a community repository (e.g. GitHub). See the Nature Research [guidelines for submitting code & software](#) for further information.

### Data

Policy information about [availability of data](#)

All manuscripts must include a [data availability statement](#). This statement should provide the following information, where applicable:

- Accession codes, unique identifiers, or web links for publicly available datasets
- A list of figures that have associated raw data
- A description of any restrictions on data availability

The data generated and analysed during this study are described in the following data record: <https://doi.org/10.6084/m9.figshare.13681456> (24). The data files underlying the related study are available from the corresponding authors upon reasonable request. However, several files are not publicly available in order to protect patient privacy. A comprehensive list of data files underlying the related manuscript along with details of their availability is contained in the spreadsheet 'Griguolo\_et\_al\_2021\_underlying\_datafile\_list.xlsx', available as part of the figshare. The custom-developed algorithms (T-cell APP) created using the Author® module of VISIOPHARM® (VIS) Image Analysis Software (Visiopharm Integrator System version 2019.02.1.6005, Visiopharm, Denmark) are also available as part of the figshare data record.

## Field-specific reporting

Please select the one below that is the best fit for your research. If you are not sure, read the appropriate sections before making your selection.

Life sciences  Behavioural & social sciences  Ecological, evolutionary & environmental sciences

For a reference copy of the document with all sections, see [nature.com/documents/nr-reporting-summary-flat.pdf](https://www.nature.com/documents/nr-reporting-summary-flat.pdf)

## Life sciences study design

All studies must disclose on these points even when the disclosure is negative.

|                 |                                                                                                                                                         |
|-----------------|---------------------------------------------------------------------------------------------------------------------------------------------------------|
| Sample size     | Samples collected during phase II PAMELA trial and available for gene-expression analysis and for multiplex IHC analysis were assessed.                 |
| Data exclusions | Samples with total region of interest below 100000 $\mu\text{m}$ were excluded from the multiplex IHC analysis.                                         |
| Replication     | No replications attempted (only few clinical trials tested chemo-free neoadjuvant regimens for HER2+ breast cancer and sample availability is limited). |
| Randomization   | No randomization. Association of biological characteristics and response to treatment was assessed.                                                     |
| Blinding        | No allocation by investigators to different treatment groups.                                                                                           |

## Reporting for specific materials, systems and methods

We require information from authors about some types of materials, experimental systems and methods used in many studies. Here, indicate whether each material, system or method listed is relevant to your study. If you are not sure if a list item applies to your research, read the appropriate section before selecting a response.

### Materials & experimental systems

| n/a                                 | Involvement in the study                                        |
|-------------------------------------|-----------------------------------------------------------------|
| <input type="checkbox"/>            | <input checked="" type="checkbox"/> Antibodies                  |
| <input checked="" type="checkbox"/> | <input type="checkbox"/> Eukaryotic cell lines                  |
| <input checked="" type="checkbox"/> | <input type="checkbox"/> Palaeontology and archaeology          |
| <input checked="" type="checkbox"/> | <input type="checkbox"/> Animals and other organisms            |
| <input type="checkbox"/>            | <input checked="" type="checkbox"/> Human research participants |
| <input type="checkbox"/>            | <input checked="" type="checkbox"/> Clinical data               |
| <input checked="" type="checkbox"/> | <input type="checkbox"/> Dual use research of concern           |

### Methods

| n/a                                 | Involvement in the study                        |
|-------------------------------------|-------------------------------------------------|
| <input checked="" type="checkbox"/> | <input type="checkbox"/> ChIP-seq               |
| <input checked="" type="checkbox"/> | <input type="checkbox"/> Flow cytometry         |
| <input checked="" type="checkbox"/> | <input type="checkbox"/> MRI-based neuroimaging |

## Antibodies

|                 |                                                                                                                                                                                                                                                                                                                                       |
|-----------------|---------------------------------------------------------------------------------------------------------------------------------------------------------------------------------------------------------------------------------------------------------------------------------------------------------------------------------------|
| Antibodies used | Detailed in Supplementary Table S18 of the manuscript.                                                                                                                                                                                                                                                                                |
| Validation      | Validation of the antibodies used is extensively detailed in the method section of the manuscript. Validated protocols are detailed in Supplementary Table S18. Comparisons with regular IHC stainings are shown in Supplementary Figure S1 and correlations with regular IHC by image analysis are shown in Supplementary Figure S2. |

## Human research participants

Policy information about [studies involving human research participants](#)

|                            |                                                                                                                                                                                                                                            |
|----------------------------|--------------------------------------------------------------------------------------------------------------------------------------------------------------------------------------------------------------------------------------------|
| Population characteristics | Detailed in the previous manuscript reporting clinical data from the PAMELA trial (Llombart-Cussac A. et al. Lancet Oncol 2018 <a href="https://doi.org/10.1016/S1470-2045(17)30021-9">https://doi.org/10.1016/S1470-2045(17)30021-9</a> ) |
| Recruitment                | Detailed in the previous manuscript reporting clinical data from the PAMELA trial (Llombart-Cussac A. et al. Lancet Oncol 2018 <a href="https://doi.org/10.1016/S1470-2045(17)30021-9">https://doi.org/10.1016/S1470-2045(17)30021-9</a> ) |
| Ethics oversight           | The study protocol was approved by independent ethics committees at each center (trial centers listed at <a href="https://clinicaltrials.gov">clinicaltrials.gov</a> , NCT01973660).                                                       |

Note that full information on the approval of the study protocol must also be provided in the manuscript.

## Clinical data

---

Policy information about [clinical studies](#)

All manuscripts should comply with the ICMJE [guidelines for publication of clinical research](#) and a completed [CONSORT checklist](#) must be included with all submissions.

|                             |                                                                                                                                                                                                                                            |
|-----------------------------|--------------------------------------------------------------------------------------------------------------------------------------------------------------------------------------------------------------------------------------------|
| Clinical trial registration | NCT01973660                                                                                                                                                                                                                                |
| Study protocol              | The study protocol defined the PAMELA clinical trial (previously reported in Llombart-Cussac A. et al. Lancet Oncol 2018 <a href="https://doi.org/10.1016/S1470-2045(17)30021-9">https://doi.org/10.1016/S1470-2045(17)30021-9</a> )       |
| Data collection             | Detailed in the previous manuscript reporting clinical data from the PAMELA trial (Llombart-Cussac A. et al. Lancet Oncol 2018 <a href="https://doi.org/10.1016/S1470-2045(17)30021-9">https://doi.org/10.1016/S1470-2045(17)30021-9</a> ) |
| Outcomes                    | Detailed in the previous manuscript reporting clinical data from the PAMELA trial (Llombart-Cussac A. et al. Lancet Oncol 2018 <a href="https://doi.org/10.1016/S1470-2045(17)30021-9">https://doi.org/10.1016/S1470-2045(17)30021-9</a> ) |
